# Supplementary material
Source: PubMed Central journal article supplement (PMC4862618)

## Supporting Information

### 1. Syntheses and characterization of **1b**·PF<sub>6</sub> and [(η<sup>6</sup>-p-cymene)Ru(*k*NPh,*k*<sup>2</sup>NO)] (**3a**).

**[(η<sup>6</sup>-p-cymene)Ru(*k*NHBn,*k*NOH)Cl]PF<sub>6</sub> (**1b**·PF<sub>6</sub>):** KPF<sub>6</sub> (0.05 g, 0.26 mmol) was added to a CH<sub>2</sub>Cl<sub>2</sub> (15.0 mL) solution of **1b** (0.15 g, 0.26 mmol), and the mixture was stirred overnight. The resulting suspension was filtered to remove insoluble KCl and the solvent was evaporated to dryness from the orange solution to afford an orange solid, which was identified as compound **1b**·PF<sub>6</sub> (yield 0.16 g, 90 %). C<sub>27</sub>H<sub>38</sub>ClF<sub>6</sub>N<sub>2</sub>OPRu (688.09): calcd. C 47.13, H 5.57, N 4.07; found C 46.80, H 4.89, N 3.32. IR (KBr):  $\nu = 3300\text{-}3100$  (NH/OH), 1646, 1614 (C=N) cm<sup>-1</sup>. <sup>1</sup>H NMR (400.1 MHz, 293 K, CDCl<sub>3</sub>):  $\delta = 7.41$  (overlapped, 5H, -C<sub>6</sub>H<sub>5</sub>), 5.85, 5.81 (both d, each 1H, <sup>3</sup>J<sub>HH</sub> = 6, p-cymene-C<sub>6</sub>H<sub>4</sub>), 5.46, 5.44 (both d, each 1H, <sup>3</sup>J<sub>HH</sub> = 8, p-cymene-C<sub>6</sub>H<sub>4</sub>), 4.78 (s, 1H, =CH<sub>2</sub>), 4.61 (m, 2H, -CH<sub>2</sub>Ph) 4.53 (br, 1H, =CH<sub>2</sub>), 3.92 (m, 1H, NH), 3.61 (d, 1H, <sup>2</sup>J<sub>HH</sub> = 14, -CH<sub>2</sub><sup>6</sup>), 2.58 (spt, 1H, <sup>3</sup>J<sub>HH</sub> = 6, p-cymene-CHMe<sub>2</sub>), 2.55 (br, 1H, -CH<sup>5</sup>), 2.32 (dd, 1H, <sup>2</sup>J<sub>HH</sub> = 16, <sup>3</sup>J<sub>HH</sub> = 6, -CH<sub>2</sub><sup>6</sup>), 1.97 (overlapped, 4H, p-cymene-CH<sub>3</sub> + CH<sub>2</sub><sup>3,4</sup>), 1.81 (m, 1H, -CH<sub>2</sub><sup>3,4</sup>), 1.64 (m, 1H, -CH<sub>2</sub><sup>3,4</sup>), 1.66 (s, 3H, CH<sub>3</sub>-C=), 1.36 (m, 1H, -CH<sub>2</sub><sup>3,4</sup>), 1.19, 0.99 (both d, each 3H, <sup>3</sup>J<sub>HH</sub> = 6, p-cymene-CH(CH<sub>3</sub>)<sub>2</sub>) ppm. <sup>31</sup>P NMR (161.9 MHz, 293 K, CDCl<sub>3</sub>):  $\delta = -144.0$  (spt, J<sub>P-F</sub> = 692 Hz, PF<sub>6</sub>) ppm. <sup>19</sup>F NMR (376.5 MHz, 293 K, CDCl<sub>3</sub>):  $\delta = -72.5$  (d, J<sub>P-F</sub> = 692 Hz, PF<sub>6</sub>) ppm.

**[(η<sup>6</sup>-p-cymene)Ru(*k*NPh,*k*<sup>2</sup>NO)] (**3a**):** A THF solution of **1a** (0.25 g, 0.44 mmol) was treated with NaOMe (0.05 g, 0.98 mmol) at room temperature. After stirring of the mixture during 2 hours, evaporation of the THF and extraction from the solid residue with toluene affords an orange solution from which an orange solid was isolated, washed with hexane (5x2 mL) and fully characterized as derivative **3a** (yield 0.18 g, 83 %). C<sub>26</sub>H<sub>34</sub>N<sub>2</sub>ORu (491.63): calcd. C 63.52, H 6.97, N 5.70; found C 63.99, H 6.90, N, 5.53. IR (KBr):  $\nu = 1622, 1590$  (C=N) cm<sup>-1</sup>. <sup>1</sup>H NMR (plus HSQC, plus HMBC, plus COSY, 400.1 MHz, 293 K, CDCl<sub>3</sub>):  $\delta = 7.28$  (m, 2H, C<sub>6</sub>H<sub>5</sub><sup>o/m</sup>), 7.16 (m, 1H, C<sub>6</sub>H<sub>5</sub><sup>p</sup>), 7.10 (m, 2H, C<sub>6</sub>H<sub>5</sub><sup>o/m</sup>), 5.26 (d, 1H, <sup>3</sup>J<sub>HH</sub> = 6, p-cymene-C<sub>6</sub>H<sub>4</sub>), 5.12 (1H, =CH<sub>2</sub>), 5.10, 5.02, 4.81 (both d, each 1H, <sup>3</sup>J<sub>HH</sub> = 6, p-cymene-C<sub>6</sub>H<sub>4</sub>), 4.73 (br, 1H, =CH<sub>2</sub>), 3.88 (d, 1H, <sup>2</sup>J<sub>HH</sub> = 16, -CH<sub>2</sub><sup>6</sup>), 2.63 (spt, 1H, <sup>3</sup>J<sub>HH</sub> = 6, CHMe<sub>2</sub>), 2.38 (br, 1H, -CH<sup>5</sup>), 2.12 (s, 3H, p-cymene-CH<sub>3</sub>), 1.85 (dd, 1H, <sup>2</sup>J<sub>HH</sub> = 16, <sup>3</sup>J<sub>HH</sub> = 6, -CH<sub>2</sub><sup>6</sup>), 1.61 (overlapped, 4H, CH<sub>3</sub>-C= + -CH<sub>2</sub><sup>4</sup>), 1.47 (overlapped, 2H, 1-CH<sub>2</sub><sup>4</sup> + 1-CH<sub>2</sub><sup>3</sup>), 1.25, 1.23 (overlapped, both d, each 3H, <sup>3</sup>J<sub>HH</sub> = 6, CH(CH<sub>3</sub>)<sub>2</sub>), 1.17 (m, 1H, -CH<sub>2</sub><sup>3</sup>), 1.05 (s, 3H, HNC-CH<sub>3</sub>) ppm. <sup>13</sup>C-NMR (plus APT, plus gHSQC, plus HMBC, 100.6 MHz, 293 K, CDCl<sub>3</sub>):  $\delta = 163.4$  (-, C=N-O), 158.3 (-, C<sub>ipso</sub>-Ph), 144.9 (-, C=CH<sub>2</sub>), 128.0, 126.6, 125.2 (+, -C<sub>6</sub>H<sub>5</sub><sup>o,m,p</sup>), 112.3 (-, =CH<sub>2</sub>), 100.3, 89.9 (-, C<sub>ipso</sub>-p-cymene), 83.1, 82.9, 82.6, 80.8 (+, p-cymene-C<sub>6</sub>H<sub>4</sub>), 77.7 (-, C-N-Ru), 42.1 (+, -CH<sup>5</sup>), 33.8 (-, -CH<sub>2</sub><sup>3</sup>), 31.4 (+, p-cymene-CHMe<sub>2</sub>), 26.2 (-, -CH<sub>2</sub><sup>4</sup>), 25.3 (-CH<sub>2</sub><sup>6</sup>), 24.1, 24.0 (both +, p-cymene-CH(CH<sub>3</sub>)<sub>2</sub>), 23.8 (+, CH<sub>3</sub>-CNH), 22.8 (+, CH<sub>3</sub>-C=), 20.0 (+, p-cymene-CH<sub>3</sub>) ppm. <sup>15</sup>N NMR (gHMBC, 40.5 MHz, 293 K, CDCl<sub>3</sub>):  $\delta = 329.0$  (=NO), 263.5 (Ru-NPh) ppm.

## Preligands a, b, c and compounds 1a, 1b and 2b

Syntheses and characterization of amino-oxime derivatives (2S,5R)-[NHR,NOH]<sup>1</sup> (R = a, b, c) and ruthenium compounds [( $\eta^6$ -p-cymene)Ru(*k*NHR,*k*NOH)Cl]Cl (R = Ph **1a**, Bn **1b**)<sup>2</sup> and [( $\eta^6$ -p-cymene)Ru(*k*NHBn,*k*<sup>2</sup>NO)Cl] (**2b**)<sup>2</sup> was reported elsewhere. During this work, we performed the IR and <sup>15</sup>N-<sup>1</sup>H HMBC spectra of all these compounds, as well as the spectroscopic NMR characterization in methanol-*d*<sub>4</sub> of compounds **1a** and **1b**, since their NMR spectra in CDCl<sub>3</sub> changed dramatically with the concentration (see Dilution Spectra, page S9). Solubility in water of **1a**, **1b** and **2b** is given in mM concentration. Data are given in the following section:

**(2S,5R)-[NHPh,NOH] (a)**. IR (KBr):  $\nu$  = 3100-3300 (NH/OH), 1644, 1602 (C=N) cm<sup>-1</sup>. <sup>15</sup>N NMR (gHMBC, 40.5 MHz, 293 K, CDCl<sub>3</sub>):  $\delta$  = 343.3 (=NOH), 84.1 (NHPh) ppm.

**(2S,5R)-[NHBn,NOH] (b)**. IR (KBr):  $\nu$  = 3100-3320 (NH/OH), 1644, 1602 (C=N) cm<sup>-1</sup>. <sup>15</sup>N NMR (gHMBC, 40.5 MHz, 293 K, CDCl<sub>3</sub>):  $\delta$  = 340.0 (=NOH), 60.0 (NHBn) ppm.

**(2S,5R)-[NH(2-pic),NOH] (c)**. IR (KBr):  $\nu$  = 3086-3314 (NH/OH), 1650, 1595 (C=N) cm<sup>-1</sup>. <sup>15</sup>N NMR (gHMBC, 40.5 MHz, 293 K, CDCl<sub>3</sub>):  $\delta$  = 343.3 (=NOH), 305.3 (=Npic), 51.8 (NH(2-pic)) ppm.

**[( $\eta^6$ -p-cymene)Ru(*k*NHPh,*k*NOH)Cl]Cl (**1a**)**: IR (KBr):  $\nu$  = 3391-3151 (NH/OH), 1642, 1597 (C=N) cm<sup>-1</sup>. Solubility in H<sub>2</sub>O at 24 °C (mM): 21 ± 2. Value of pH ([9.0 mM]) in H<sub>2</sub>O at 24 °C: 4.62.

<sup>1</sup>H NMR (plus HMBC, gHSQC, plus COSY, 400.1 MHz, 293 K, CD<sub>3</sub>OD):  $\delta$  = 7.89, 7.65, 7.52, 7.41, 7.02 (all br, each 1H, C<sub>6</sub>H<sub>5</sub>), 6.19, 5.86, 5.52 (all d, each 1H, <sup>3</sup>J<sub>HH</sub> = 6, C<sub>6</sub>H<sub>4</sub>), 5.39 (s, 1H, NH), 4.85, 4.85 (overlapped with CD<sub>3</sub>OD, 2H, C<sub>6</sub>H<sub>4</sub> + =CH<sub>2</sub>), 4.60 (br, 1H, =CH<sub>2</sub>), 3.66 (d, 1H, <sup>2</sup>J<sub>HH</sub> = 15, CH<sub>2</sub><sup>6</sup>), 2.71 (spt, 1H, <sup>3</sup>J<sub>HH</sub> = 7, p-cymene-CHMe<sub>2</sub>), 2.53 (m, 1H, -CH<sup>5</sup>), 2.56 (m, 1H, -CH<sub>2</sub><sup>6</sup>), 2.27 (s, 3H, p-cymene-CH<sub>3</sub>), 1.78 (m, 1H, -CH<sub>2</sub><sup>4</sup>), 1.79 (s, 3H, CH<sub>3</sub>-C=), 1.67 (s, 3H, PhNC-CH<sub>3</sub>), 1.55 (m, 3H, -CH<sub>2</sub><sup>4</sup>+ -CH<sub>2</sub><sup>3</sup>), 1.13, 0.62 (both d, each 3H, <sup>3</sup>J<sub>HH</sub> = 7, p-cymene-CH(CH<sub>3</sub>)<sub>2</sub>) ppm. <sup>13</sup>C NMR (plus APT, plus gHSQC, plus HMBC, 100.6 MHz, 293 K, CD<sub>3</sub>OD):  $\delta$  = 170.2 (-, C=NO), 146.3 (-, =C-Me), 144.1 (-, C<sub>ipso</sub>-Ph), 130.8, 130.8, 129.2, 125.6, 126.2, 114.2 (-, =CH<sub>2</sub>), 106.3 (-, C<sub>ipso</sub>, p-cymene-CCHMe<sub>2</sub>), 98.8 (-, C<sub>ipso</sub>, p-cymene-CMe), 87.3, 86.1, 87.9, 81.9 (all +, p-cymene-C<sub>6</sub>H<sub>4</sub>), 71.6 (-, C-NH), 49.9 (+, -CH<sup>5</sup>), 36.0 (-, -CH<sub>2</sub><sup>3</sup>), 31.9 (+, p-cymene-CHMe<sub>2</sub>), 28.9 (-, -CH<sub>2</sub><sup>6</sup>), 24.1 (+, p-cymene-CH(CH<sub>3</sub>)<sub>2</sub>), 24.7 (-CH<sub>2</sub><sup>4</sup>), 22.6 (+, CH<sub>3</sub>-C=), 22.2 (+, CH<sub>3</sub>-CNPh), 19.0 (+, p-cymene-CH(CH<sub>3</sub>)<sub>2</sub>), 18.6 (+, p-cymene-CH<sub>3</sub>) ppm. <sup>15</sup>N NMR (gHMBC, 40.5 MHz, 293 K, CDCl<sub>3</sub>):  $\delta$  = 272.1 (=NOH), 68.1 (NHPh) ppm. <sup>15</sup>N NMR (gHMBC, 40.5 MHz, 293 K, CD<sub>3</sub>OD):  $\delta$  = 266.5 (=NOH), 68.2 (NHPh) ppm.

**[( $\eta^6$ -p-cymene)Ru(*k*NHBn,*k*NOH)Cl]Cl (**1b**)**: IR (KBr):  $\nu$  = 3400-3040 (NH/NOH), 1643, 1600 (C=N) cm<sup>-1</sup>. Solubility in H<sub>2</sub>O at 24 °C (mM): 28 ± 4. Value of pH ([9.0 mM]) in H<sub>2</sub>O at 24 °C: 4.70.

<sup>1</sup> Carman, R. M.; Mathew, P. C.; Saraswathi, G. N.; Singaram, B.; Verghese, J. *Aust. J. Chem.* **1977**, *30*, 1323

<sup>2</sup> Ibn El Alami, M. S.; El Amrani, M. A.; Dahdouh, A.; Roussel, P.; Suisse, I.; Mortreux, A. *Chirality* **2012**, *24*, 675-682 and references therein.

$^1\text{H}$  NMR (plus gHSQC, plus HMBC, plus COSY, 400.1 MHz, 293 K,  $\text{CD}_3\text{OD}$ ):  $\delta$  = 7.45 (m, 5H,  $\text{C}_6\text{H}_5$ ), 5.85, 5.84, 5.46, 5.33 (d, each 1H,  $^3J_{\text{HH}} = 6$ , p-cymene- $\text{C}_6\text{H}_4$ ), 4.79 (m, 1H,  $=\text{CH}_2$ ), 4.62 (second order system, 2H,  $-\text{CH}_2\text{Ph}$ ), 4.60 (br, 1H,  $=\text{CH}_2$ ), 4.02 (br, 1H, NH), 3.60 (d, 1H,  $^2J_{\text{HH}} = 16$ ,  $\text{CH}_2^6$ ), 2.53 (overlapped, 3H, p-cymene- $\text{CHMe}_2 + \text{CH}_2^6 + \text{CH}^5$ ), 2.14 (m, 1H,  $-\text{CH}_2^3$ ), 1.99 (s, 3H, p-cymene- $\text{CH}_3$ ), 1.83 (m, 2H,  $-\text{CH}_2^4$ ), 1.66, 1.65 (both s, each 3H,  $\text{BnNC-CH}_3 + \text{CH}_3\text{-C=}$ ), 1.39 (m, 1H,  $-\text{CH}_2^3$ ), 1.22, 1.02 (both d, each 3H,  $^3J_{\text{HH}} = 8$ , p-cymene- $\text{CH}(\text{CH}_3)_2$ ) ppm.  $^{13}\text{C}$ - NMR (plus APT, plus gHSQC, 100.6 MHz, 293 K,  $\text{CD}_3\text{OD}$ ):  $\delta$  = 170.8 (-, C=N), 145.9 (-,  $=\text{C-CH}_3$ ), 137.1 (-,  $\text{C}_{\text{ipso}}\text{-Ph}$ ), 130.1, 129.5, 129.4 (all +, -  $\text{C}_6\text{H}_5^{(\text{o,m,p})}$ ), 113.2 (-,  $=\text{CH}_2$ ), 108.9, 98.8 (both -,  $\text{C}_{\text{ipso}}\text{-p-cymene}$ ), 87.5, 84.8, 83.3, 83.2 (all +,  $-\text{C}_6\text{H}_4$ ), 70.5 (-, C-NH), 55.9 (-,  $\text{CH}_2\text{Ph}$ ), 39.4 (+,  $-\text{CH}^5$ ), 35.4 (-,  $-\text{CH}_2^3$ ), 32.5 (+, p-cymene- $\text{CHMe}_2$ ), 29.1 (-,  $-\text{CH}_2^6$ ), 25.1 ( $-\text{CH}_2^4$ ), 23.9 (+, p-cymene- $\text{CH}(\text{CH}_3)_2$ ), 22.3 (+,  $\text{CH}_3\text{-C-NH}$ ), 20.8 (+, p-cymene- $\text{CH}(\text{CH}_3)_2$ ), 20.7 (+,  $\text{CH}_3\text{-C=}$ ), 18.4 (+, p-cymene- $\text{CH}_3$ ) ppm.  $^{15}\text{N}$  NMR (gHMBC, 40.5 MHz, 293 K,  $\text{CDCl}_3$ ):  $\delta$  = 272.0 (=NOH), 50.4 (NHBn) ppm.  $^{15}\text{N}$  NMR (gHMBC, 40.5 MHz, 293 K,  $\text{CD}_3\text{OD}$ ):  $\delta$  = 266.7 (=NOH), 50.0 (NHBn) ppm.

**$[(\eta^6\text{-p-cymene})\text{Ru}(\kappa\text{NHBn}, \kappa\text{NO})\text{Cl}]$  (2b).** IR (KBr):  $\nu$  = 3400-3060 (NH/NOH), 1700, 1643 (C=N)  $\text{cm}^{-1}$ . Solubility in  $\text{H}_2\text{O}$  at 24  $^\circ\text{C}$  (mM):  $20.0 \pm 4$ .  $^{15}\text{N}$  NMR (gHMBC, 40.5 MHz, 293 K,  $\text{CDCl}_3$ ):  $\delta$  = 291.7 (=NOH), 50.4 (NHBn) ppm.

## 2. <sup>1</sup>H NMR dilution data

Dilutions experiments were carried out from an initial stock solution. This initial stock solution (500 μL) was diluted with 100 μL of CDCl<sub>3</sub> and the dilution process sequentially repeated for the next 9 samples.

OriginLab Software was used for least-squares curve fitting to the theoretical equation:

Dimerization model, Eq.1:  $\delta = \delta_m + ((\delta_d - \delta_m) * (1 + ((1 - ((8 * K_a * C) + 1)^{1/2}))) / (4 * K_a * C))$  or

Infinite association model, Eq.1:  $\delta = \delta_m + ((\delta_a - \delta_m) * (1 + ((1 - ((4 * K_a * C) + 1)^{1/2}))) / (2 * K_a * C))$

Where  $\delta_m$  = calculated chemical shift of the monomer,  $\delta_d$  = calculated chemical shift of the dimer;  $K_a$  = association constant;  $C$  = Total concentration;  $\delta_a$  = average chemical shift of aggregates.

### 1a. <sup>1</sup>H NMR dilution data of 1a and 1b in CDCl<sub>3</sub>

**Table S1.** Tabulated <sup>1</sup>H NMR dilution data for the –CH<sub>2</sub><sup>6</sup> protons of 1a at 22 °C

| Conc <sup>a</sup> | $\delta$ -CH <sub>2</sub> <sup>6</sup> |
|-------------------|----------------------------------------|
| 65,185            | 3,752                                  |
| 32,592            | 3,780                                  |
| 21,728            | 3,799                                  |
| 16,296            | 3,810                                  |
| 13,037            | 3,818                                  |
| 10,864            | 3,824                                  |
| 9,312             | 3,829                                  |
| 8,148             | 3,831                                  |
| 7,243             | 3,836                                  |
| 6,518             | 3,839                                  |
| $\delta_m^b$      | 3.871±0.003                            |
| $\delta_d^c$      | 3.619±0.009                            |
| $K_a^d$           | 13.27±1.5                              |
| $R^e$             | 0.99915                                |

<sup>a</sup>Total millimolar concentration of compound. <sup>b</sup>calculated chemical shifts for the monomer. <sup>c</sup>calculated chemical shifts for the dimer. <sup>d</sup> Association constant of dimerization (M<sup>-1</sup>). <sup>e</sup> goodness-of-fit value

**Figure S1.** Concentration dependence of  $^1\text{H}$  NMR chemical shifts for the  $-\text{CH}_2^{\delta}$  proton of **1a** in  $\text{CDCl}_3$

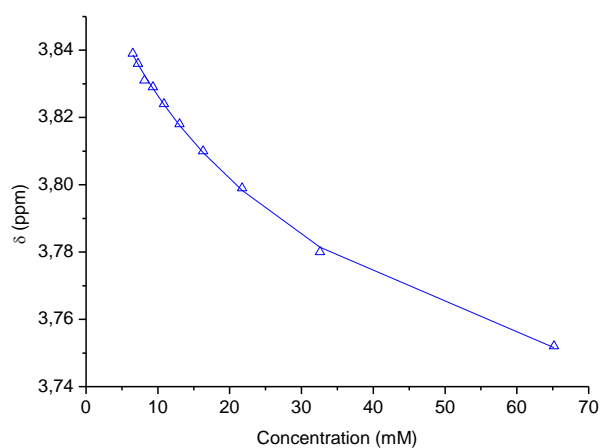

**Table S2.** Tabulated  $^1\text{H}$  NMR dilution data for the  $-\text{CH}_2^{\delta}$  protons of **1b** at 22 °C

| Conc <sup>a</sup> | $\delta$ - $\text{CH}_2^{\delta}$ |
|-------------------|-----------------------------------|
| 67.406            | 3.661                             |
| 33.703            | 3.696                             |
| 22.469            | 3.717                             |
| 16.851            | 3.730                             |
| 13.481            | 3.742                             |
| 11.234            | 3.752                             |
| 9.629             | 3.761                             |
| 8,426             | 3.768                             |
| 7,489             | 3.772                             |
| 6,741             | 3.776                             |
| $\delta m^b$      | $3.849 \pm 0.006$                 |
| $\delta d^c$      | $3.542 \pm 0.007$                 |
| $Ka^d$            | $29.95 \pm 3.8$                   |
| $R^e$             | 0.99931                           |

<sup>a</sup>Total millimolar concentration of compound. <sup>b</sup> Calculated chemical shifts for the monomer. <sup>c</sup> Calculated chemical shifts for the dimer. <sup>d</sup> Association constant of dimerization ( $\text{M}^{-1}$ ). <sup>e</sup> goodness-of-fit value

**Figure S2.** Concentration dependence of  $^1\text{H}$  NMR chemical shifts for the  $-\text{CH}_2^6$  proton of **1b** in  $\text{CDCl}_3$

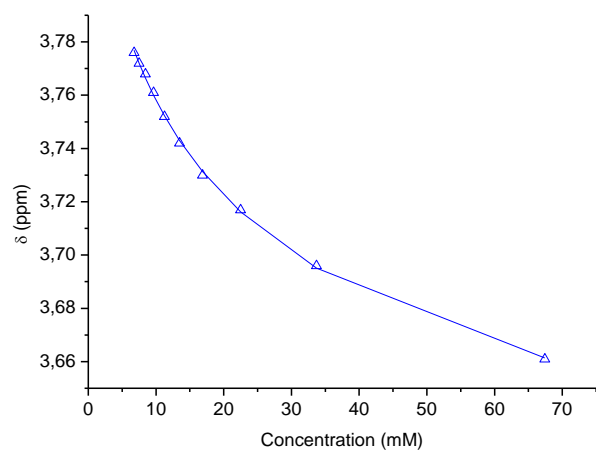

### 3. DOSY NMR data

DOSY experiments were acquired in a Bruker Ultra Shield 400 spectrometer, using the ledbpgp2s pulse program. The gradient strength (g) was the variable parameter, while  $\Delta$  (diffusion time) and  $\delta$  (diffusion gradient length) were kept constant during the 2D-DOSY study. Appropriate  $\Delta$  and  $\delta$  values were selected for each sample by optimization of the attenuation of the  $^1\text{H}$  NMR signals in 1D-versions of the diffusing ledbpgp1s pulse program. The values of  $\Delta$  and  $\delta$  were 40-100 ms and 1.5-2.5 ms, respectively; depending on the sample and the solution concentration (eddy current delay was set to 5 ms in all the experiments). The pulse gradients (g) were incremented from 2 to 95% of the maximum gradient strength in a linear ramp. The diffusion dimension was processed with Bruker topspin T1/T2 software.

**Table S3.** Full data of diffusion coefficients ( $Dt$ ,  $\text{m}^2 \cdot \text{s}^{-1}$ ) for solutions of TMSS (1mM) and TMSO (1mM) at various concentrations (C, mM) of compounds **1a-c**, **1b**·**PF<sub>6</sub>**, **2b** and **3b** at 295 K.

| Compound                          | Solvent                                | C    | $10^{10} \cdot Dt_{(s)}$ | $10^{10} \cdot Dt_{(\text{TMSS})}$ | $10^{10} \cdot Dt_{(\text{TMSO})}$ |
|-----------------------------------|----------------------------------------|------|--------------------------|------------------------------------|------------------------------------|
| <b>1a</b>                         | $\text{CDCl}_3$                        | 11.7 | 6.957                    | 11.31                              | 10.76                              |
| <b>1a</b>                         | $\text{CDCl}_3$                        | 63.0 | 5.180                    | 11.06                              | 10.56                              |
| <b>1a</b>                         | $\text{CDCl}_3:\text{C}_6\text{D}_6^a$ | 5.31 | 6.685                    | 10.88                              | 10.13                              |
| <b>1a</b>                         | $\text{CDCl}_3:\text{C}_6\text{D}_6^a$ | 65.5 | 3.676                    | 10.62                              | 9.952                              |
| <b>1a</b>                         | $\text{CD}_3\text{OD}$                 | 14.5 | 6.966                    | 9.648                              | 9.063                              |
| <b>1a</b>                         | $\text{CD}_3\text{OD}$                 | 76.5 | 6.280                    | 9.265                              | 8.661                              |
| <b>1a</b>                         | $(\text{CD}_3)_2\text{CO}$             | 7.75 | 11.67                    | 18.49                              | 16.72                              |
| <b>1a</b>                         | $(\text{CD}_3)_2\text{CO}$             | 64.9 | 10.02                    | 17.08                              | 15.59                              |
| <b>1c</b>                         | $(\text{CD}_3)_2\text{CO}$             | 3.25 | 10.59                    | 19.61                              | 17.70                              |
| <b>1c</b>                         | $(\text{CD}_3)_2\text{CO}$             | 62.1 | 10.42                    | 19.61                              | 17.70                              |
| <b>1b</b>                         | $\text{CDCl}_3$                        | 6.92 | 7.894                    | 12.62                              | 11.74                              |
| <b>1b</b>                         | $\text{CDCl}_3$                        | 30.7 | 4.442                    | 10.72                              | 10.13                              |
| <b>1b</b>                         | $\text{CDCl}_3$                        | 62.5 | 3.362                    | 10.58                              | 9.848                              |
| <b>1b</b> · <b>PF<sub>6</sub></b> | $\text{CDCl}_3$                        | 6.10 | 5.473                    | 10.71                              | 10.17                              |
| <b>1b</b> <b>PF<sub>6</sub></b>   | $\text{CDCl}_3$                        | 52.3 | 4.346                    | 10.62                              | 10.07                              |
| <b>2b</b>                         | $\text{CDCl}_3$                        | 7.38 | 5.739                    | 11.03                              | 10.46                              |
| <b>2b</b>                         | $\text{CDCl}_3$                        | 81.2 | 4.830                    | 11.03                              | 10.27                              |
| <b>3b</b>                         | $\text{CDCl}_3$                        | 5.82 | 8.542                    | 11.49                              | 10.66                              |
| <b>3b</b>                         | $\text{CDCl}_3$                        | 87.1 | 7.341                    | 10.67                              | 9.914                              |

<sup>a</sup>  $\text{CDCl}_3:\text{C}_6\text{D}_6 = 8:2$

## 4. Selected NMR spectra

### 4a. Dilution Spectra

a)  $^1\text{H}$  NMR of **1a** in  $\text{CDCl}_3$  at different concentrations (25 °C)

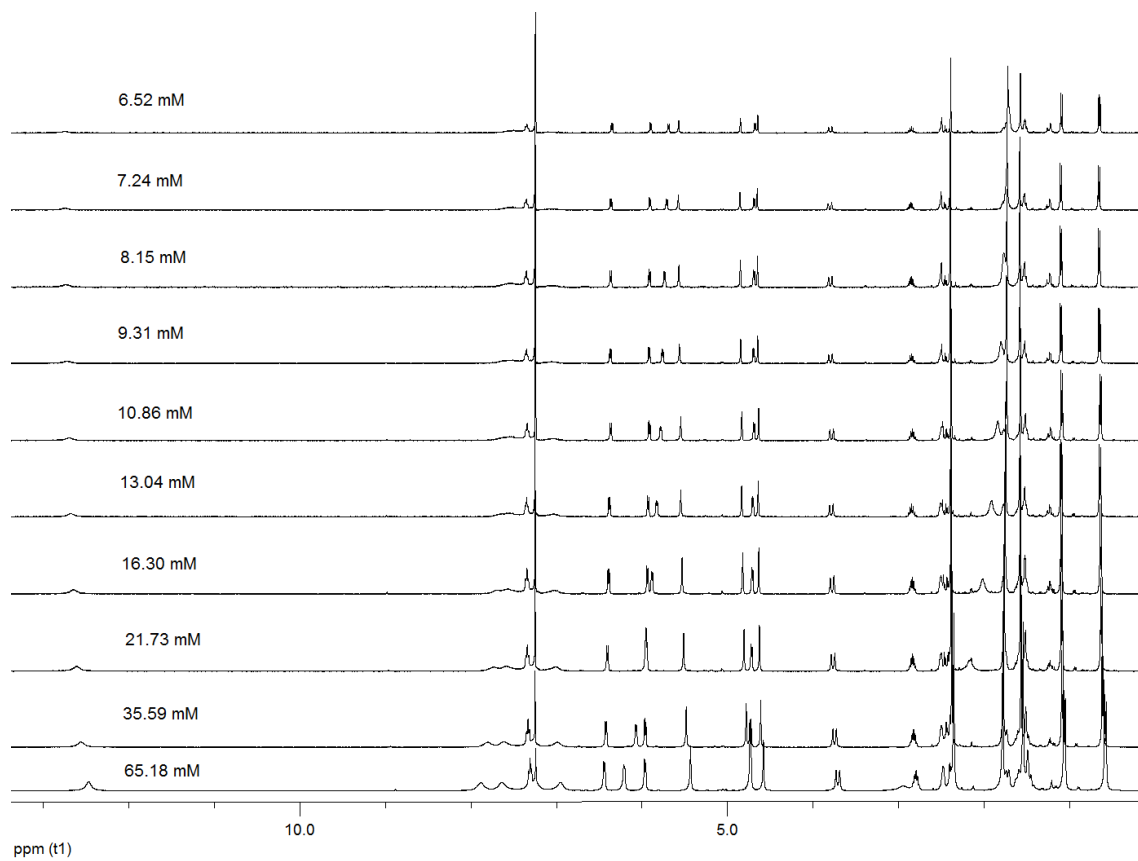



b)  $^1\text{H}$  NMR (full and expansion) of **1b** in  $\text{CDCl}_3$  at different concentrations (25  $^\circ\text{C}$ )

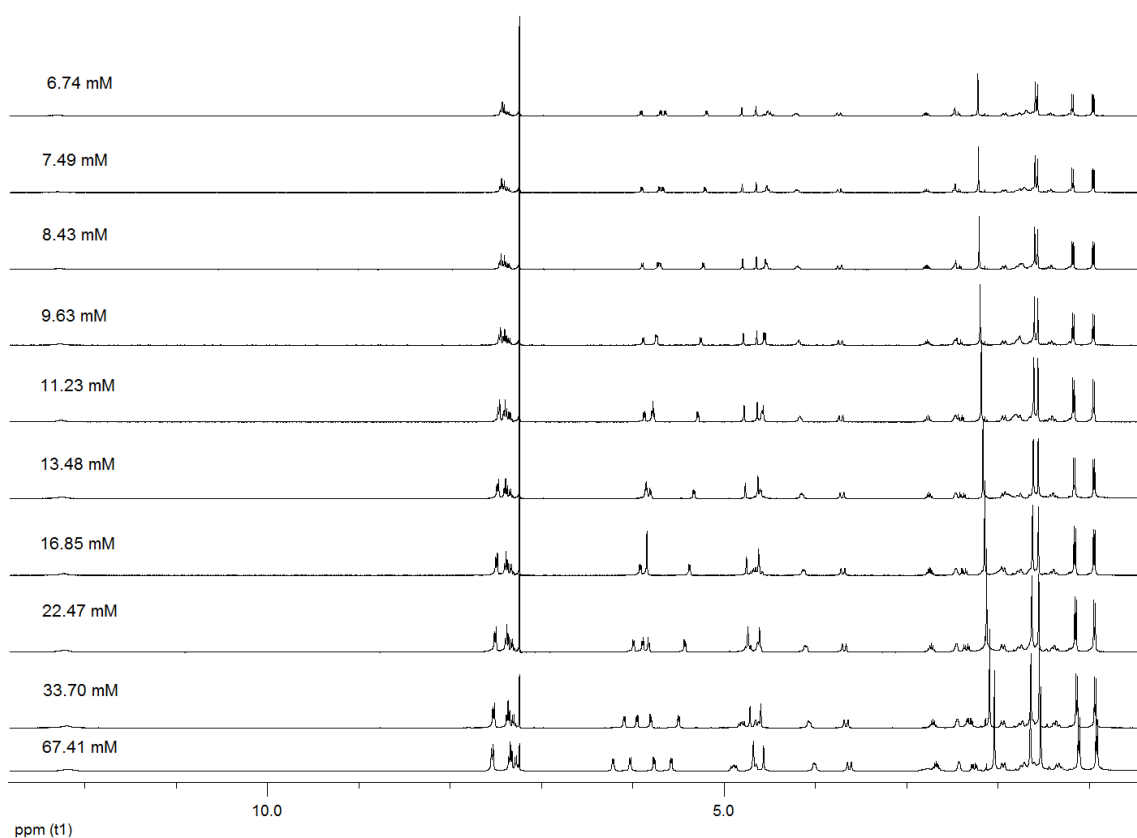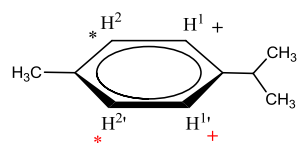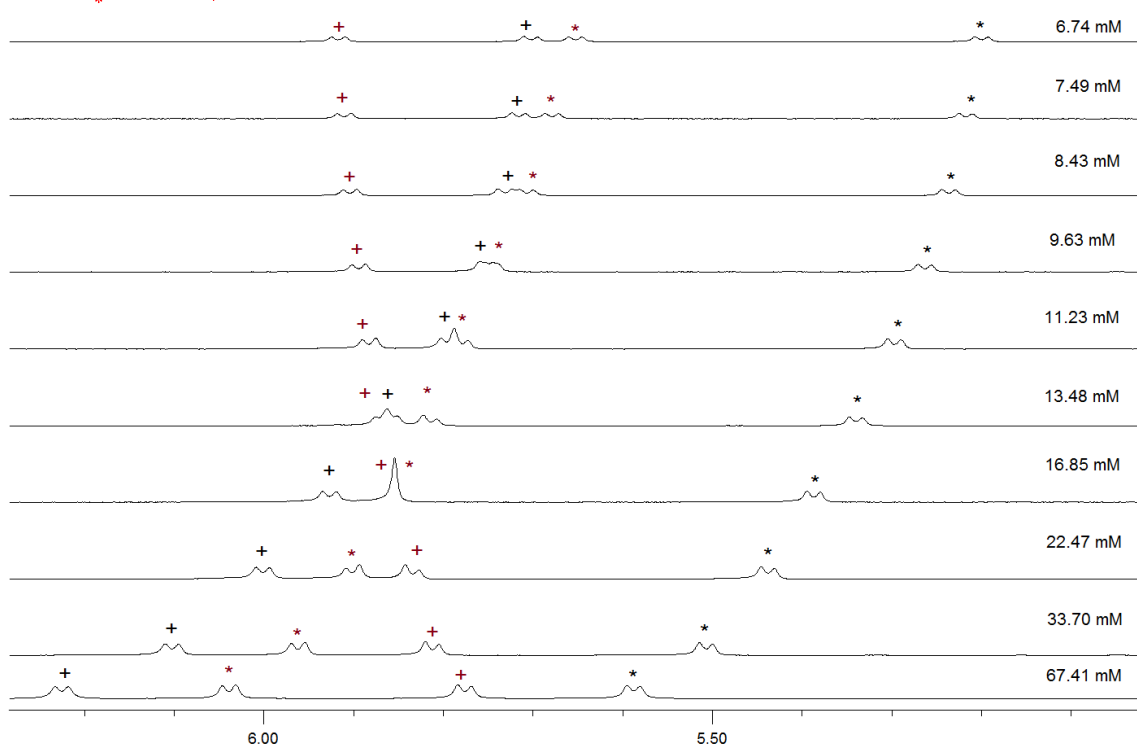

### Assignment of p-cymene proton resonances of **1b** in CDCl<sub>3</sub>

c) Expansion of <sup>1</sup>H-<sup>1</sup>H COSY NMR spectrum of **1b** in CDCl<sub>3</sub> (67.41 mM)

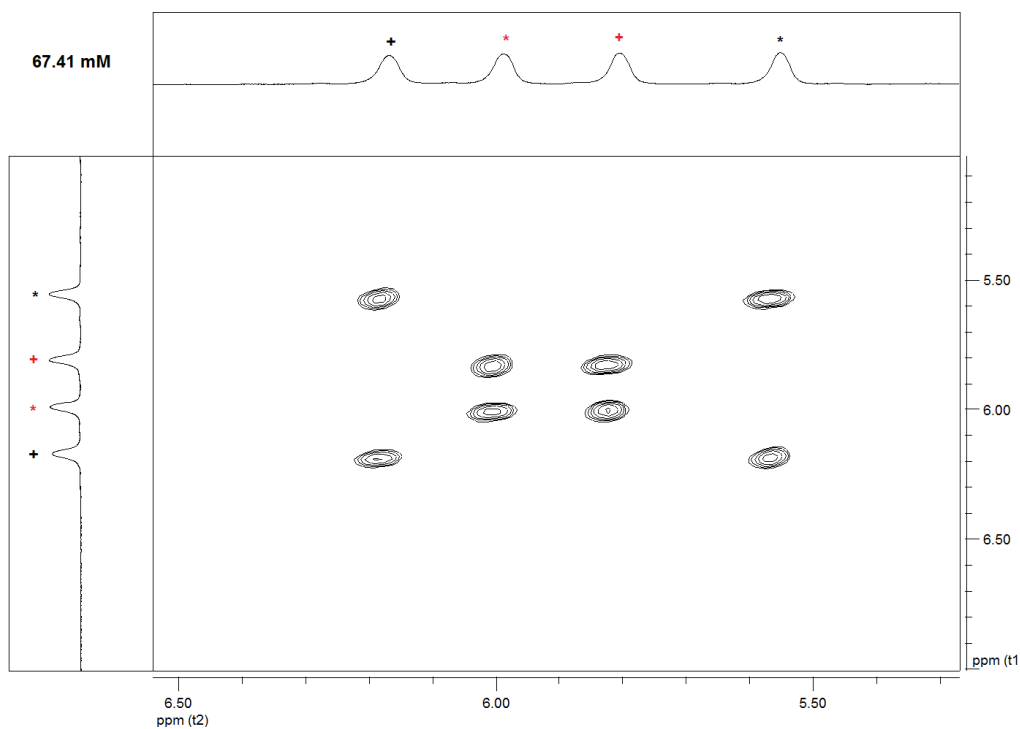

d) Expansion of <sup>1</sup>H-<sup>13</sup>C HMBC NMR spectrum of **1b** in CDCl<sub>3</sub> (67.41 mM)

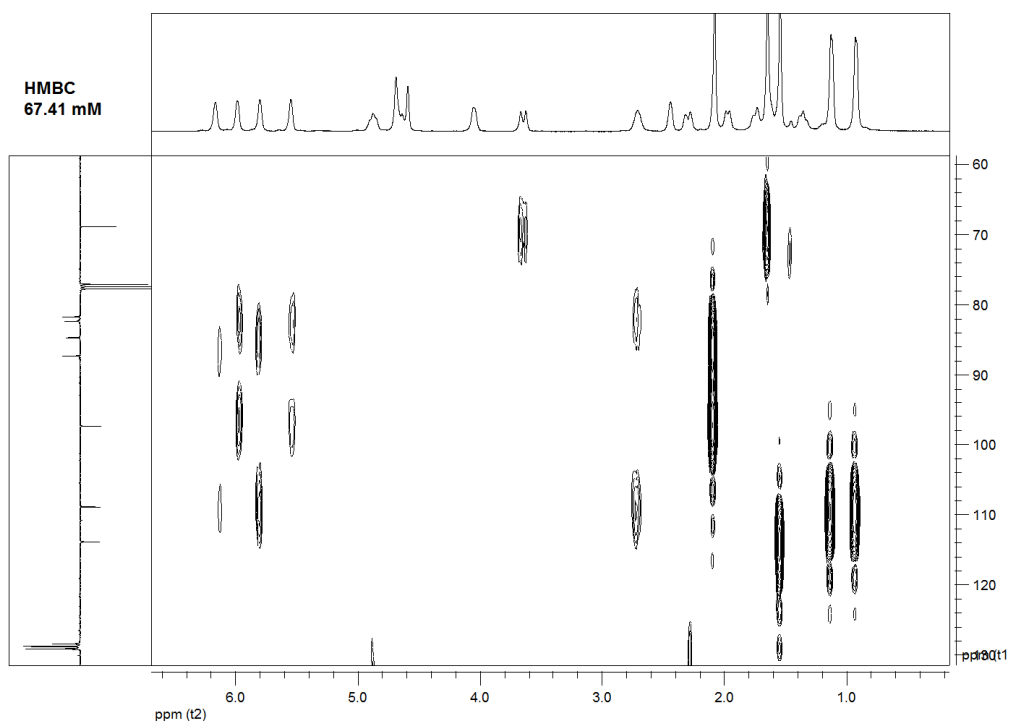

e) Expansion of  $^1\text{H}$ - $^1\text{H}$  COSY NMR spectrum of **1b** in  $\text{CDCl}_3$  (3.45 mM)

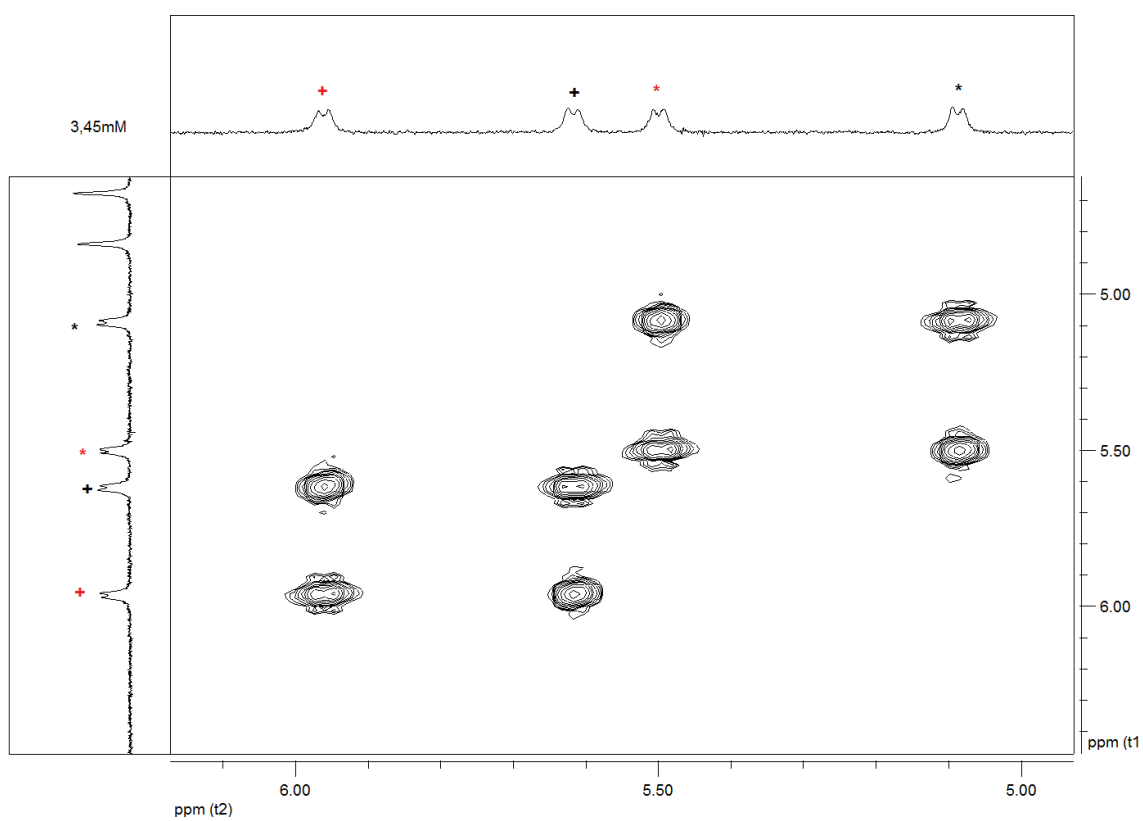

f) Expansion of  $^1\text{H}$ - $^{13}\text{C}$  HMBC NMR spectrum of **1b** in  $\text{CDCl}_3$  (3.45 mM)

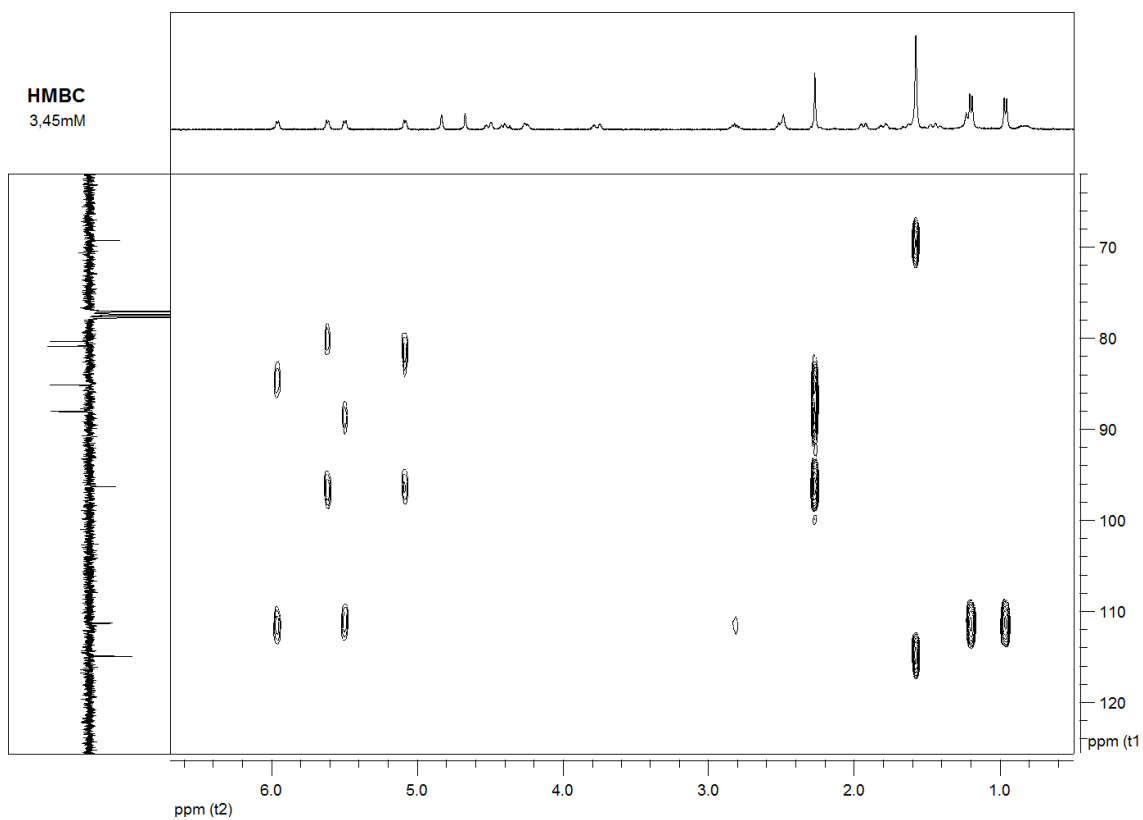

#### 4b. DOSY spectra

a) DOSY NMR of **1b**, (62,5mM), TMSS (1mM) and TMSO (1mM) in CDCl<sub>3</sub>

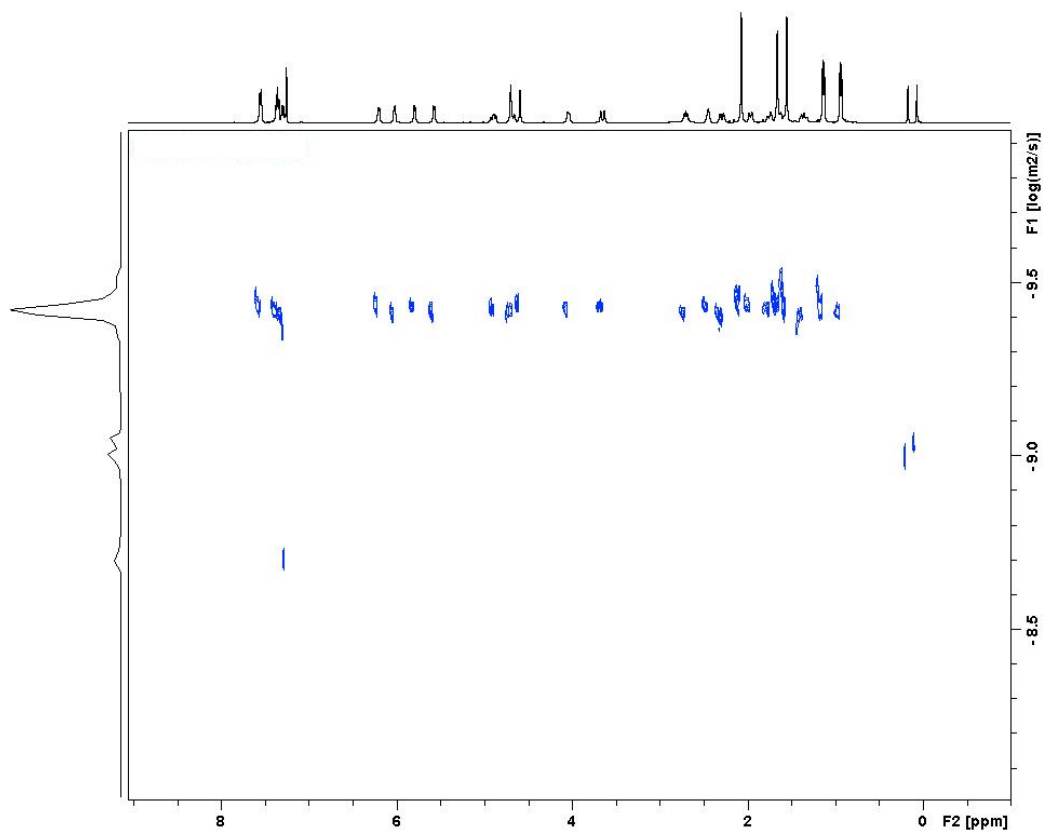

b) DOSY NMR of **1b**, (6.92 mM), TMSS (1mM) and TMSO (1mM) in CDCl<sub>3</sub>

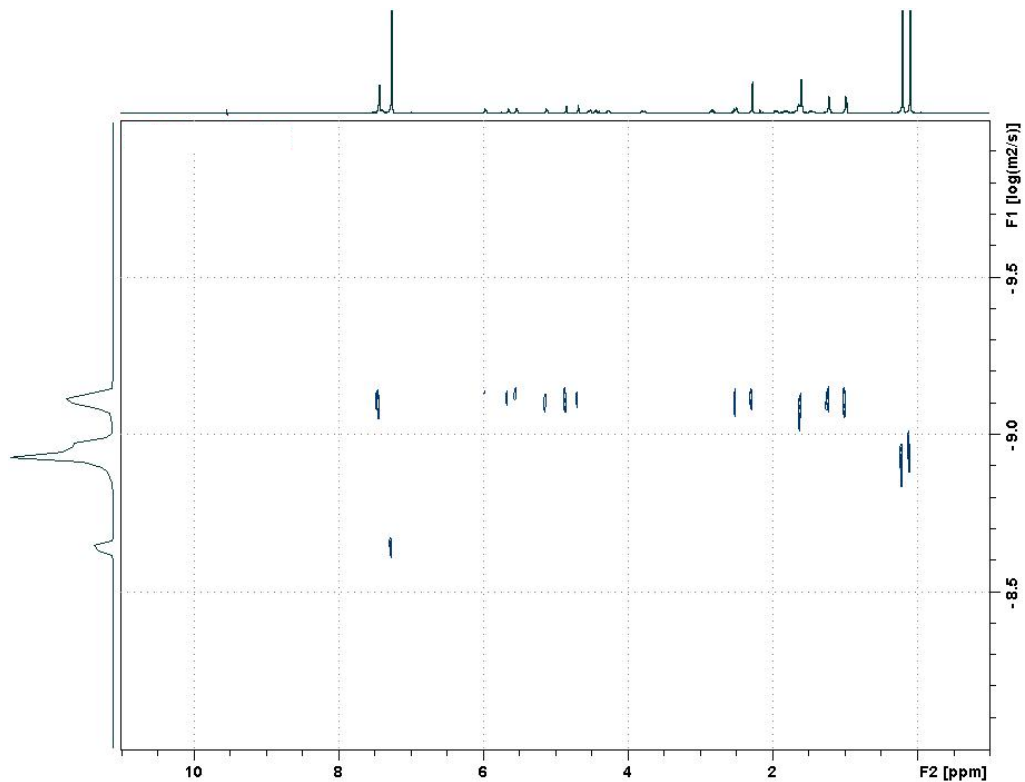

c) DOSY NMR of **1a**, (65.5 mM), TMSS (1mM) and TMSO (1mM) in C<sub>6</sub>D<sub>6</sub>:CDCl<sub>3</sub> (8:2)

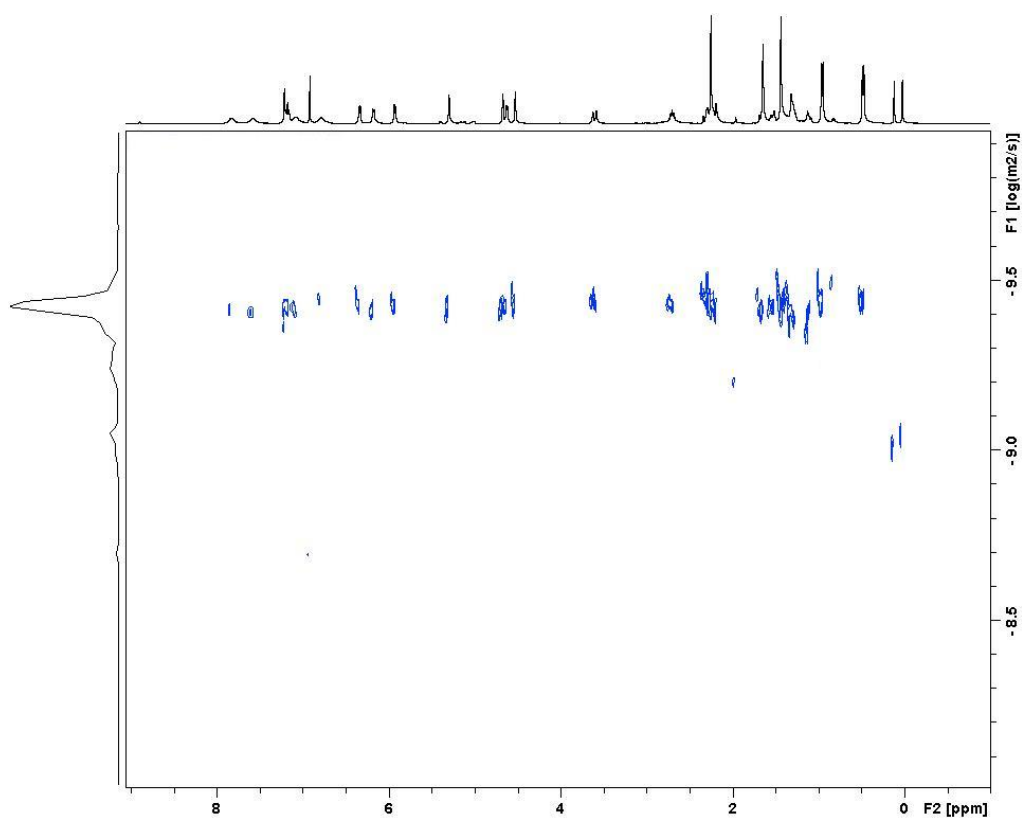

d) DOSY NMR of **1a**, (5.31 mM), TMSS (1mM) and TMSO (1mM) in C<sub>6</sub>D<sub>6</sub>:CDCl<sub>3</sub> (8:2)

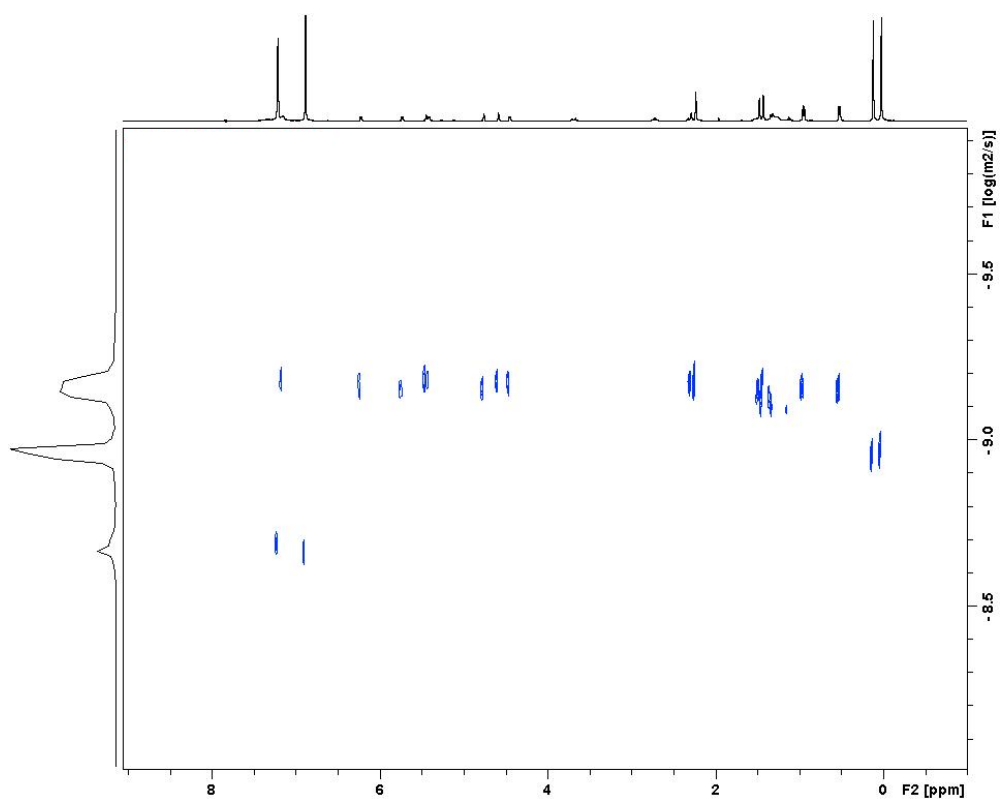

e) DOSY NMR of **1a**, (64.9 mM), TMSS (1mM) and TMSO (1mM) in acetone- $d_6$

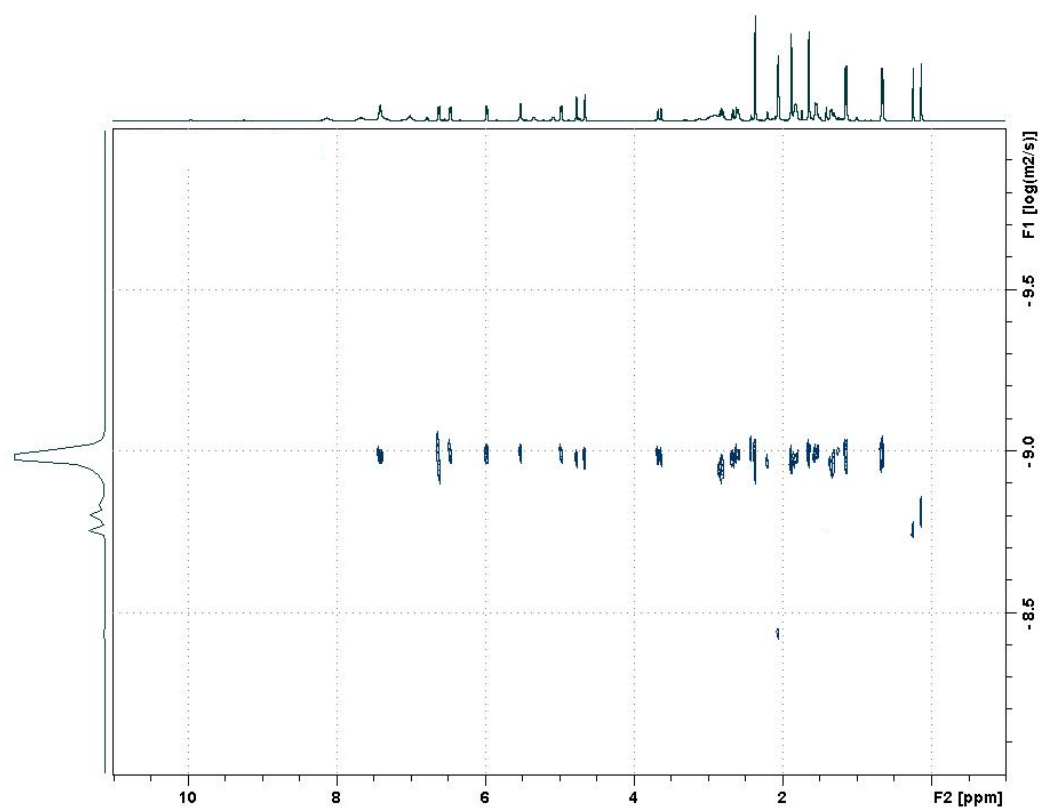

f) DOSY NMR of **1a**, (7.75 mM), TMSS (1mM) and TMSO (1mM) in acetone- $d_6$

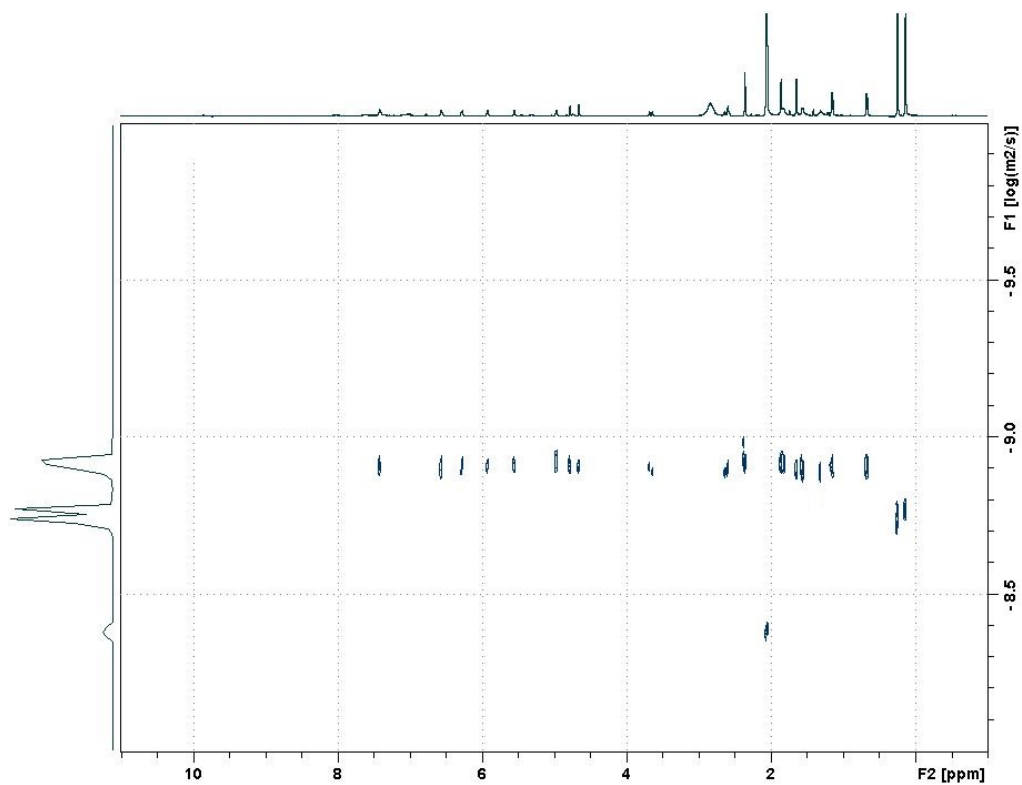

g) DOSY NMR of **1a**, (76.5 mM), TMSS (1mM) and TMSO (1mM) in methanol-d<sub>4</sub>

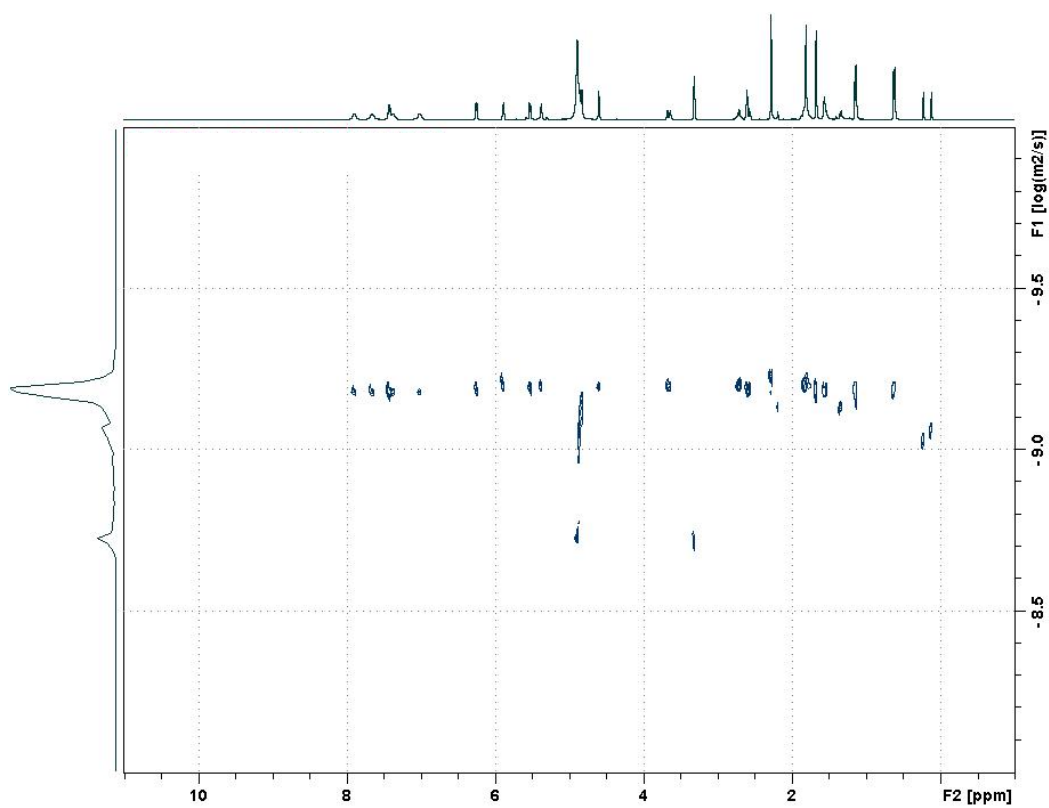

h) DOSY NMR of **1a**, (14.5 mM), TMSS (1mM) and TMSO (1mM) in methanol-d<sub>4</sub>

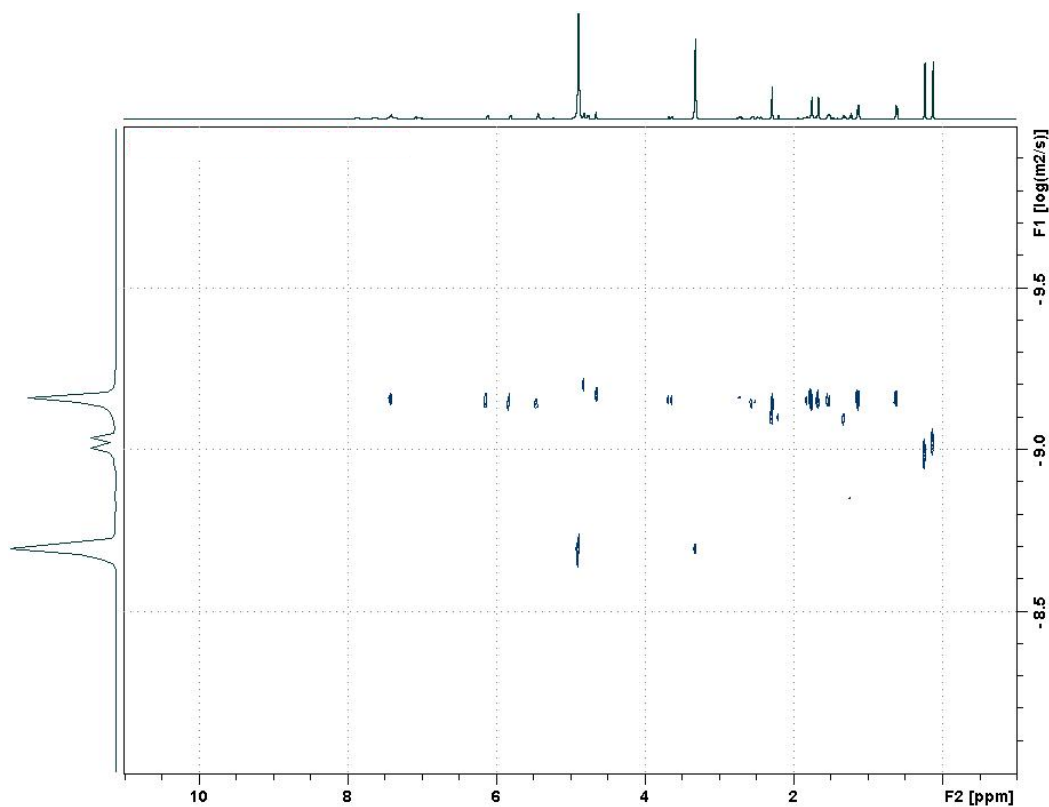

4c. Selected NMR spectra of amino-oxime compounds a, b, b-HCl, c and corresponding ruthenium compounds 1a-c, 2b, 3a and 3b.

1.  $^1\text{H}$  NMR of (2S,5R)-[ClH·NHBn,NOH] (**b-HCl**) in  $\text{DMSO-}d_6$

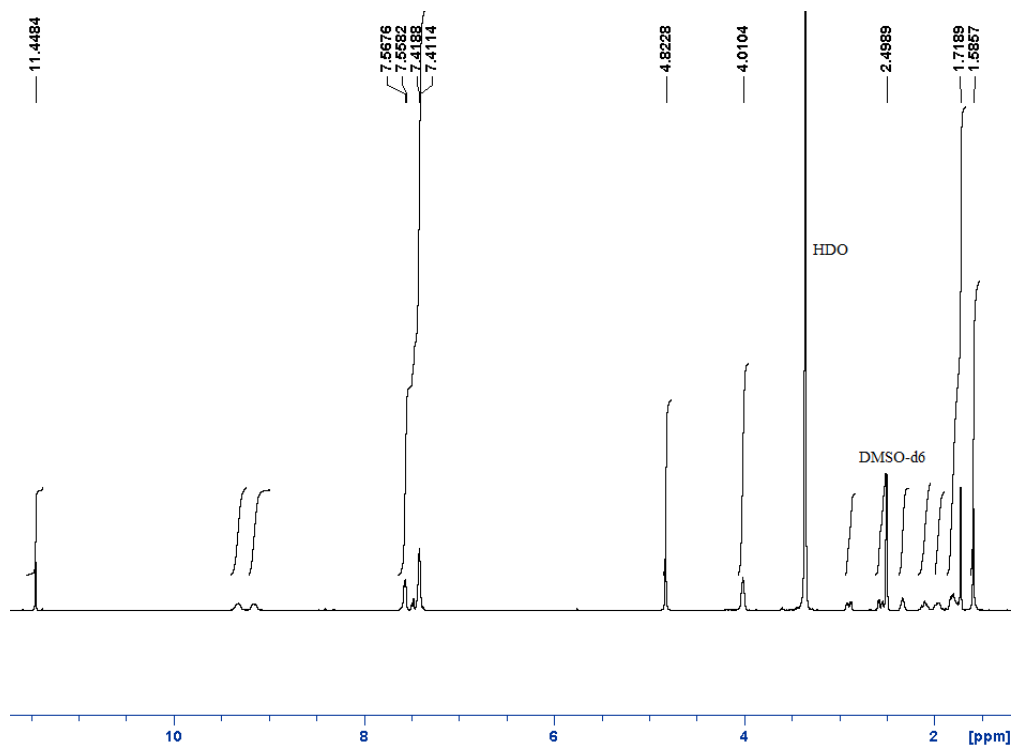

2.  $^1\text{H-}^{15}\text{N}$  HMBC NMR of (2S,5R)-[NHPH,NOH] (**a**) in  $\text{CDCl}_3$

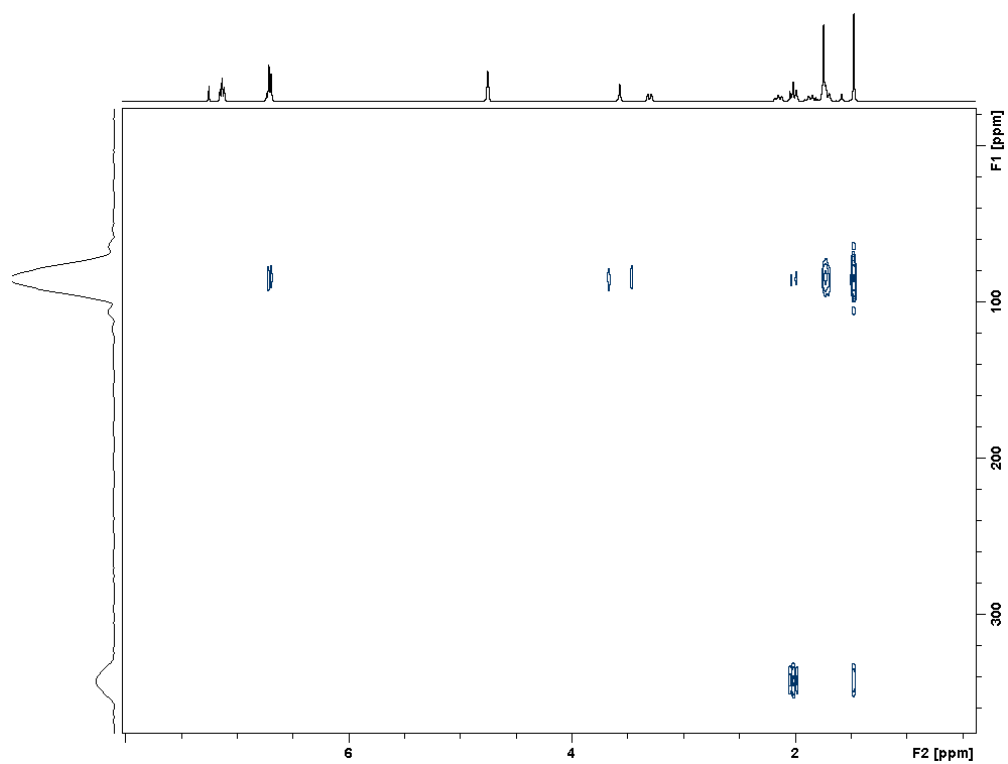



3.  $^1\text{H}$ - $^{15}\text{N}$  HMBC NMR of (2S,5R)-[NHBn,NOH] (**b**) in  $\text{CDCl}_3$

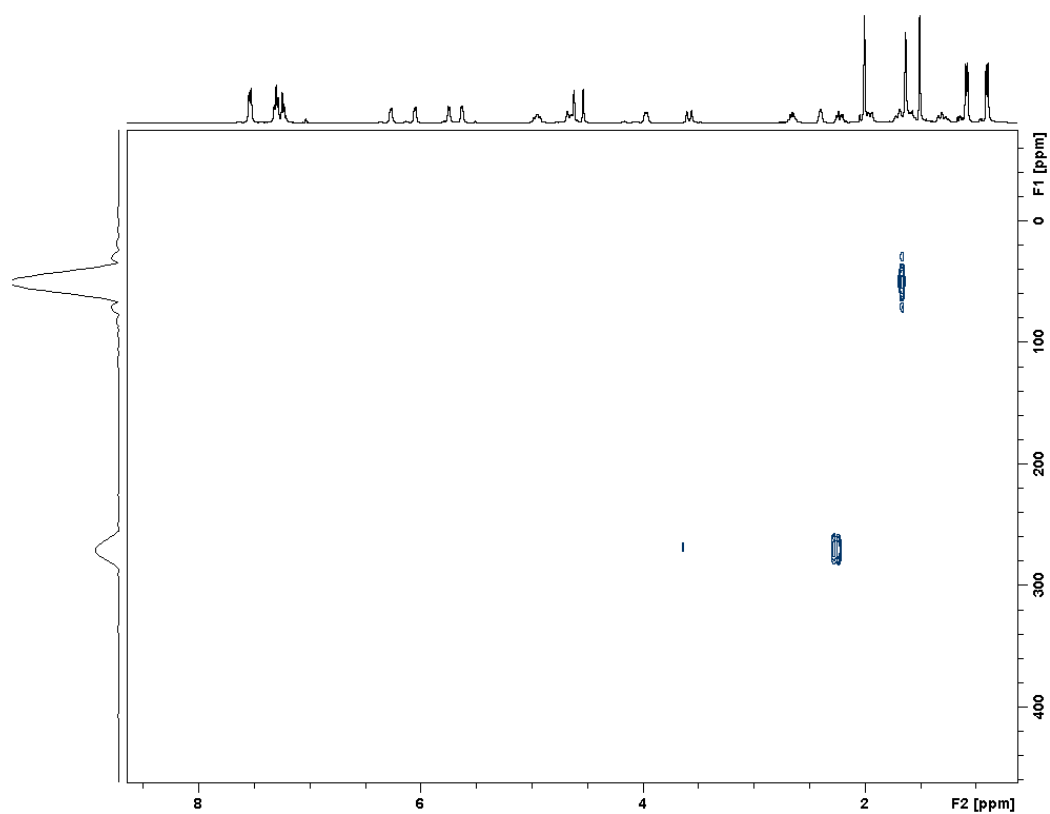

4.  $^1\text{H}$ - $^{15}\text{N}$  HMBC NMR of (2S,5R)-[NH(2-pic),NOH] (**c**) in  $\text{CDCl}_3$

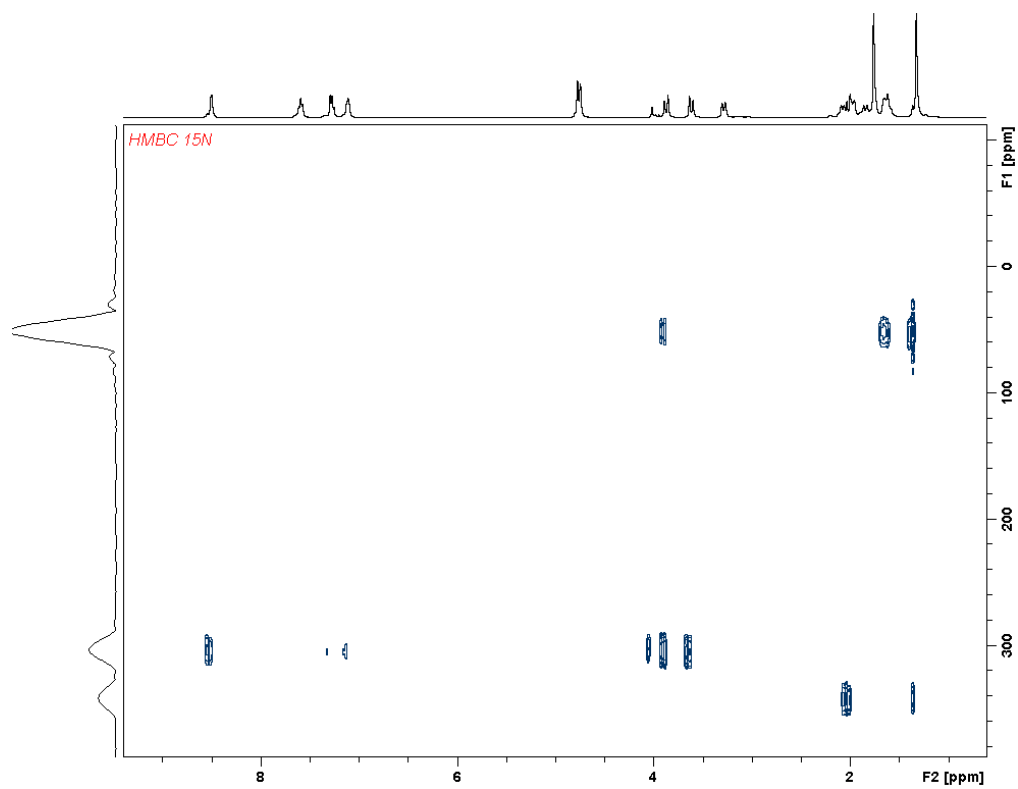

5.  $^1\text{H}$ - $^{15}\text{N}$  HMBC NMR of **1b** in  $\text{CDCl}_3$

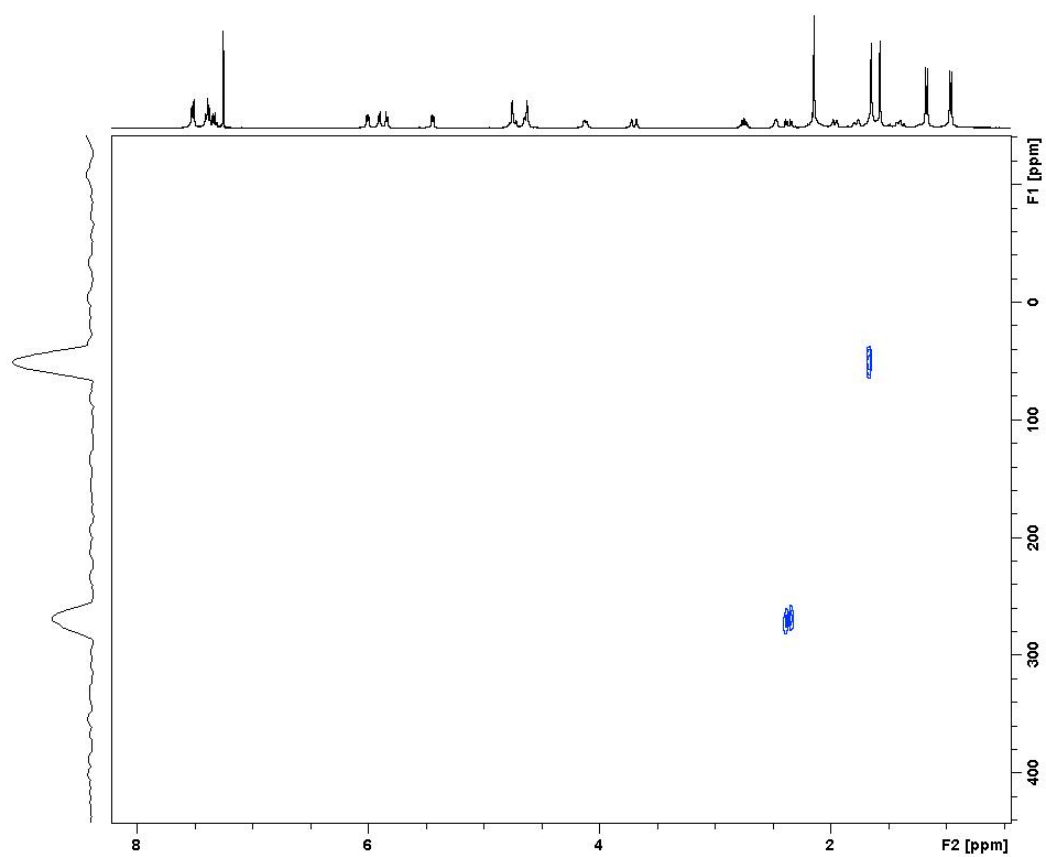

6.  $^1\text{H}$  NMR of **1a** in  $\text{D}_2\text{O}$

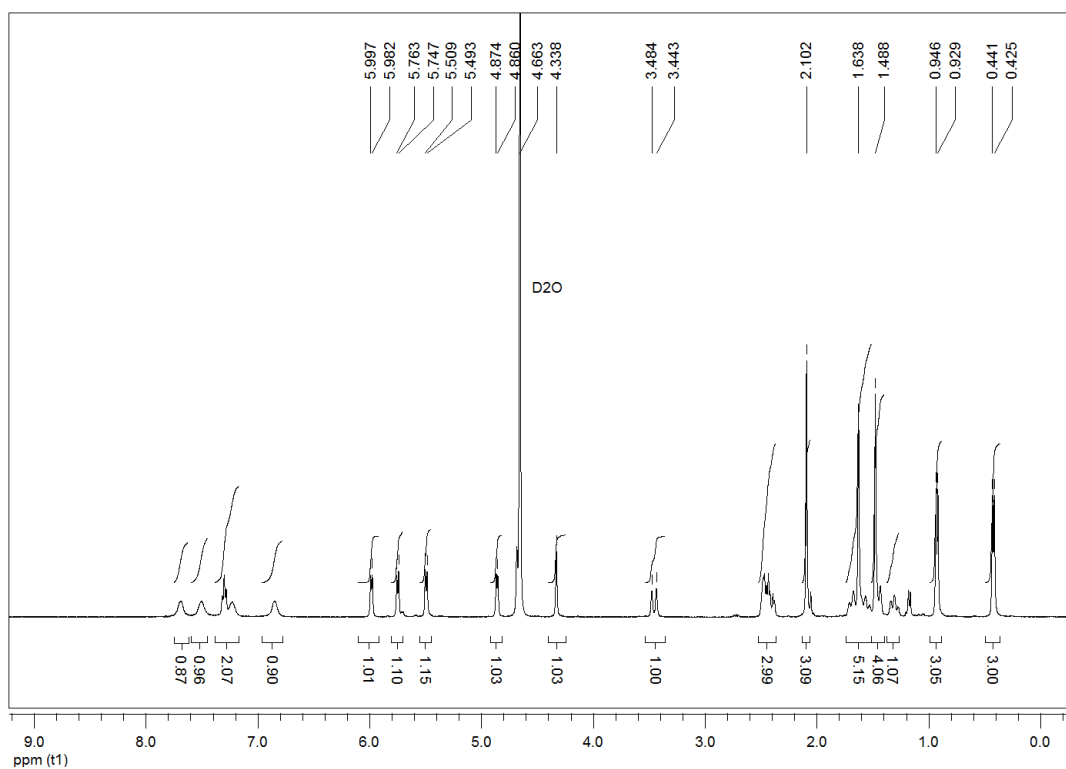

7.  $^1\text{H}$  NMR of **1b** in  $\text{D}_2\text{O}$

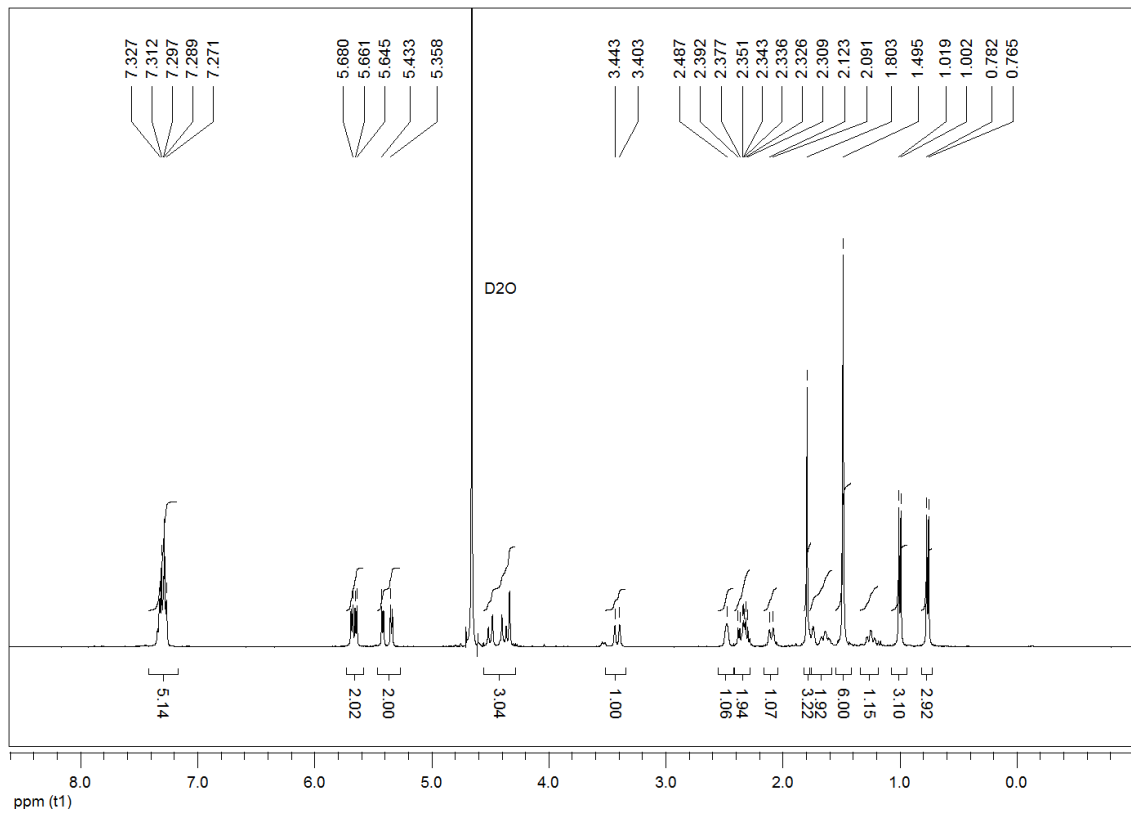

8.  $^1\text{H}$  NMR of **1c** in  $\text{D}_2\text{O}$

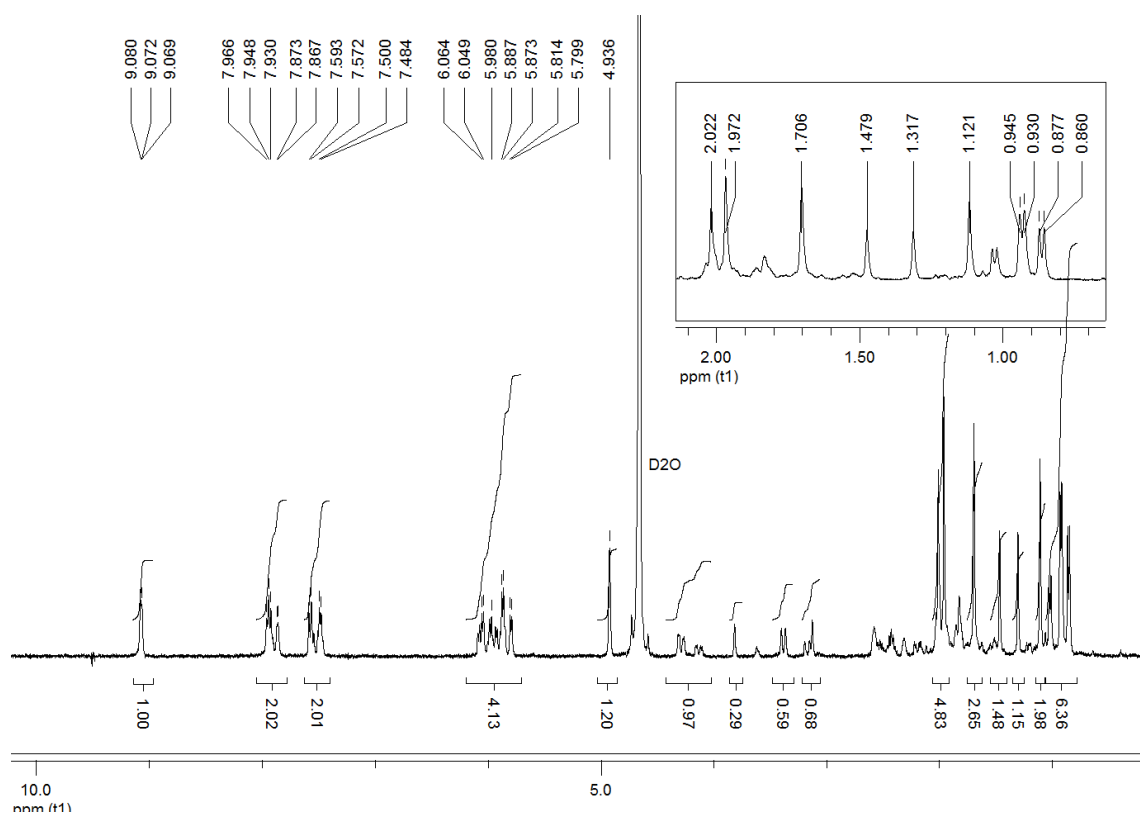

# NMR spectra of 1c in acetone-d<sub>6</sub>

## 1. <sup>1</sup>H NMR of 1c

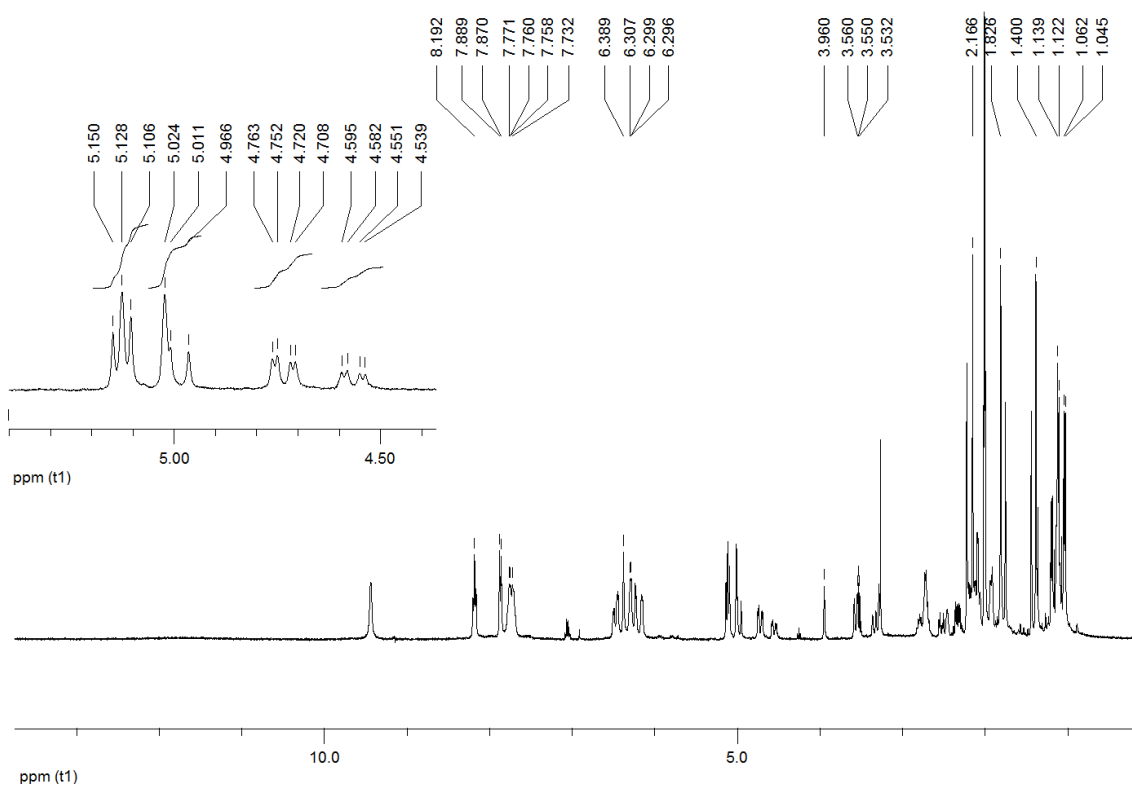

## 2. <sup>13</sup>C APT-NMR of 1c

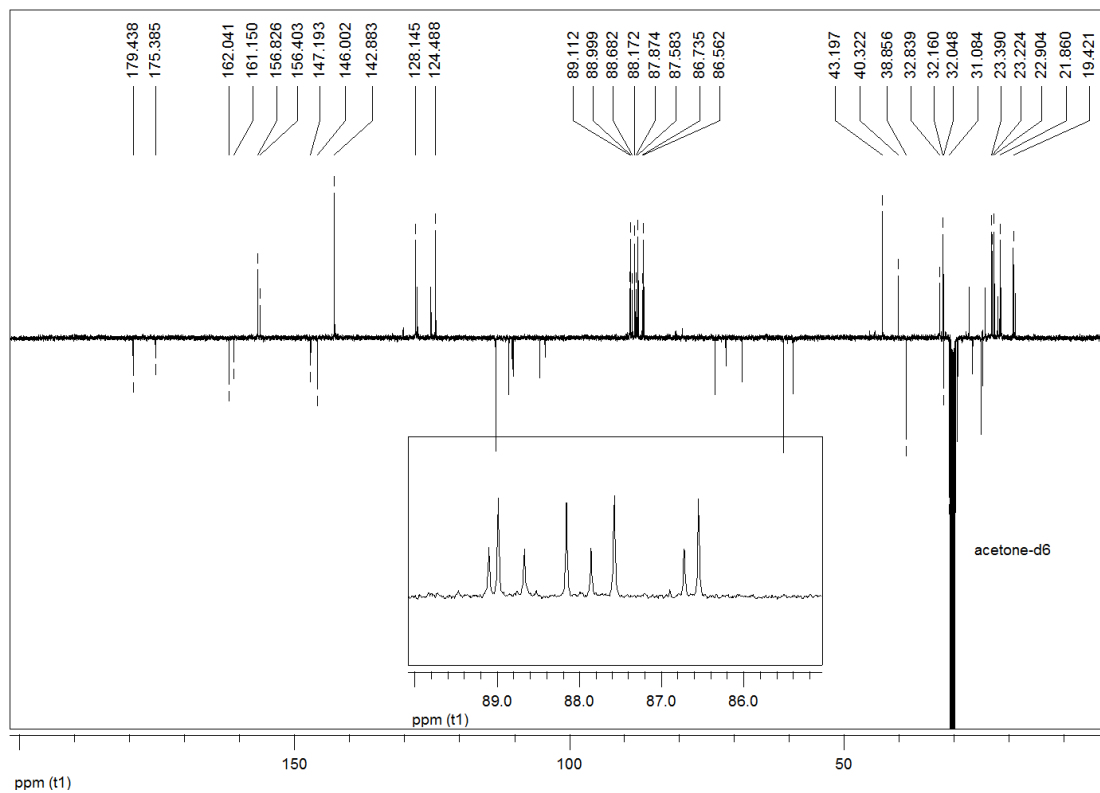

3.  $^1\text{H}$ - $^{13}\text{C}$  CHSQC NMR of **1c**

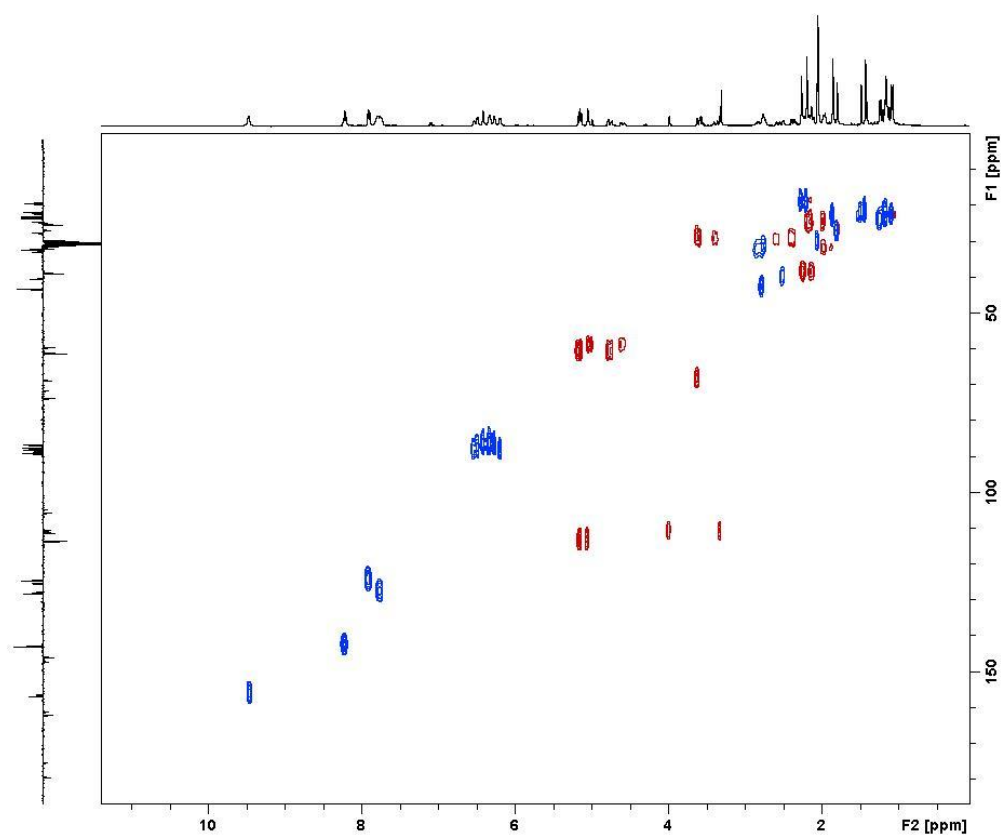

4.  $^1\text{H}$ - $^{13}\text{C}$  HMBC NMR of **1c**

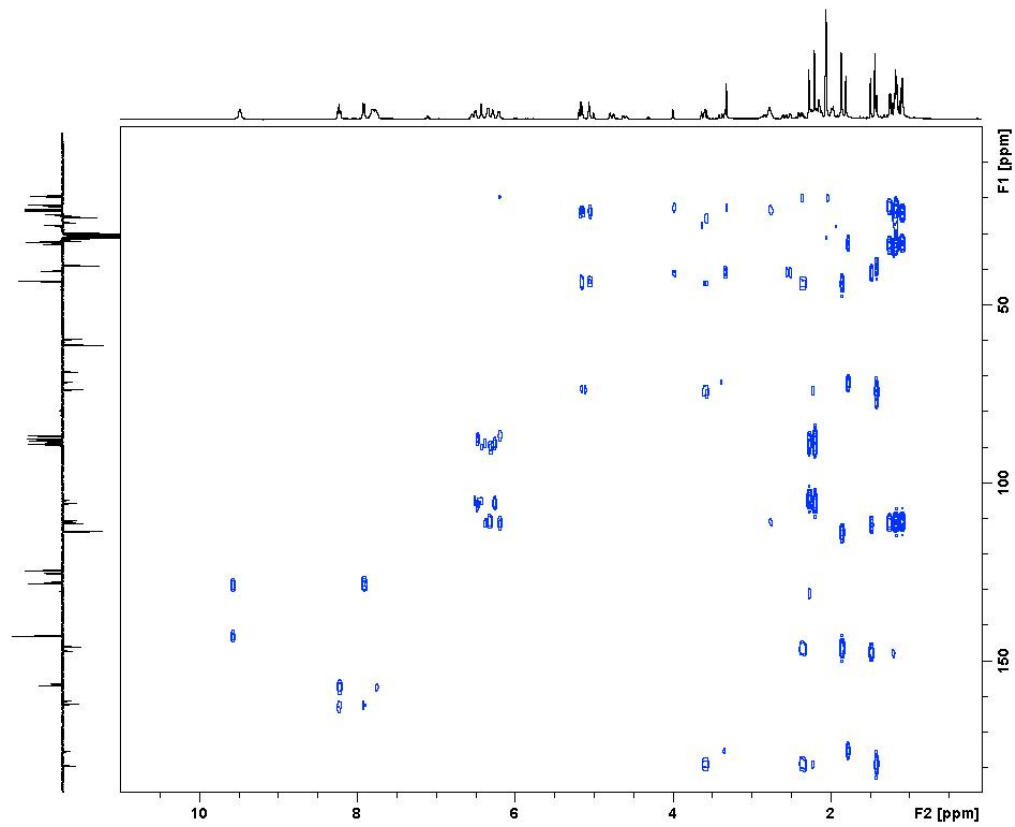

5.  $^1\text{H}$ - $^{15}\text{N}$  HMBC NMR of **1c**

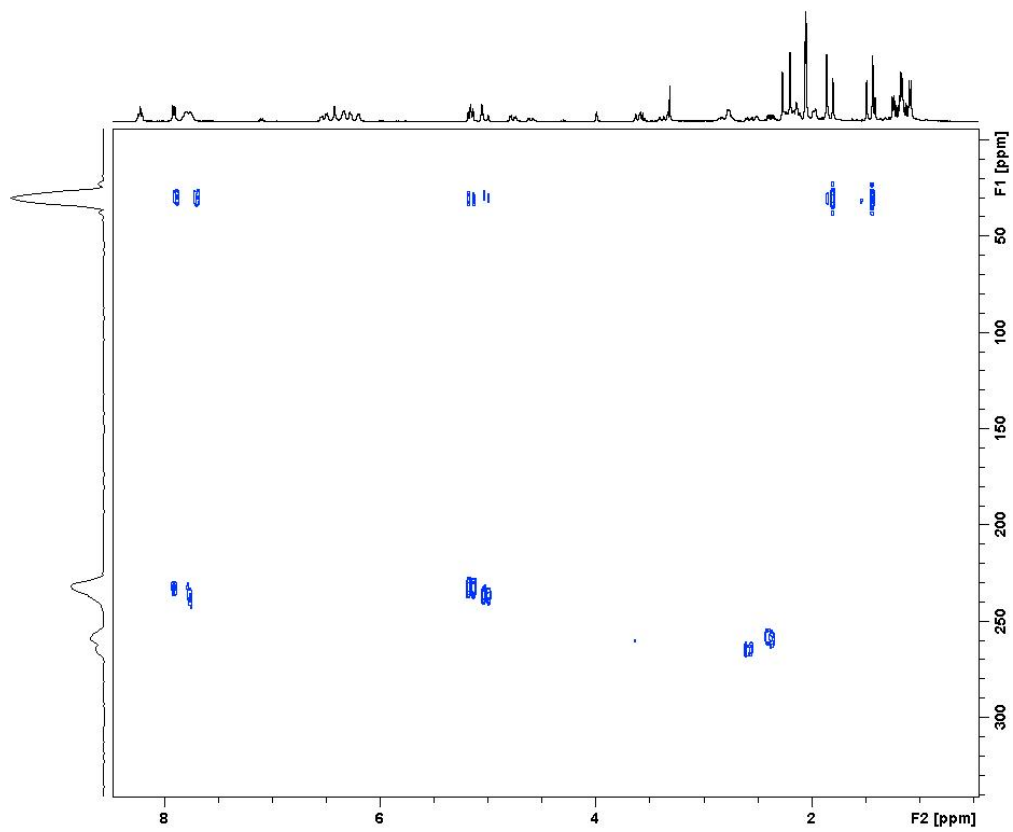

## NMR spectra of 3b in CDCl<sub>3</sub>

### 1. <sup>1</sup>H NMR of 3b

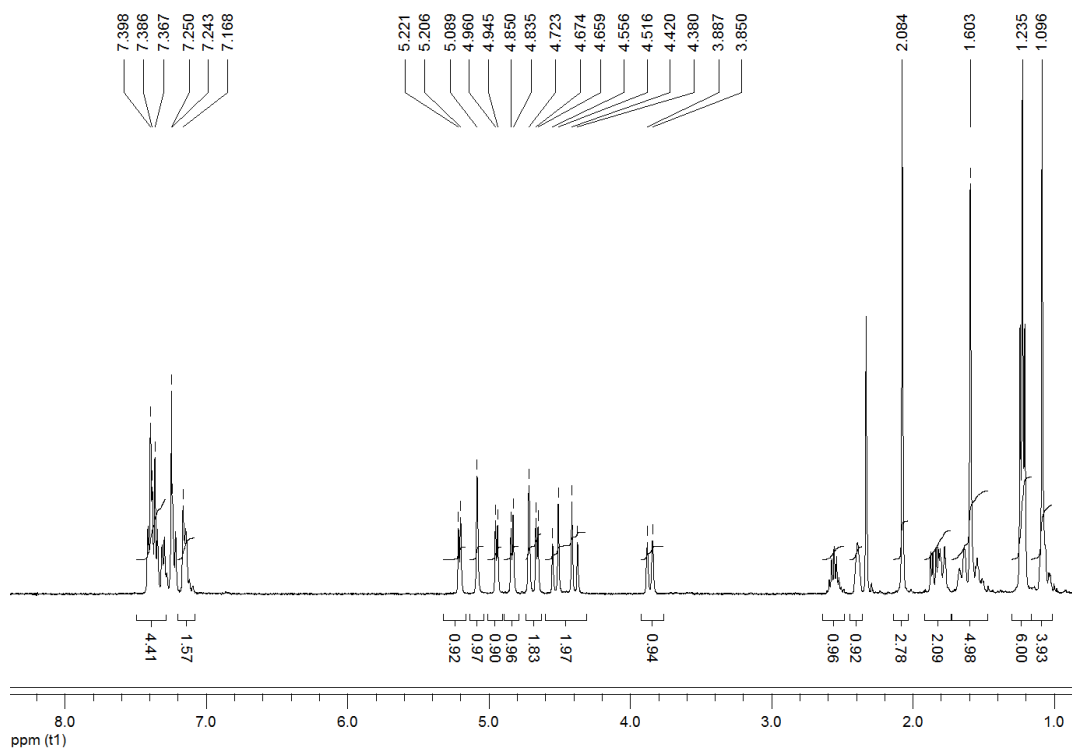

### 2. <sup>1</sup>H-<sup>15</sup>N HMBC NMR of 3b

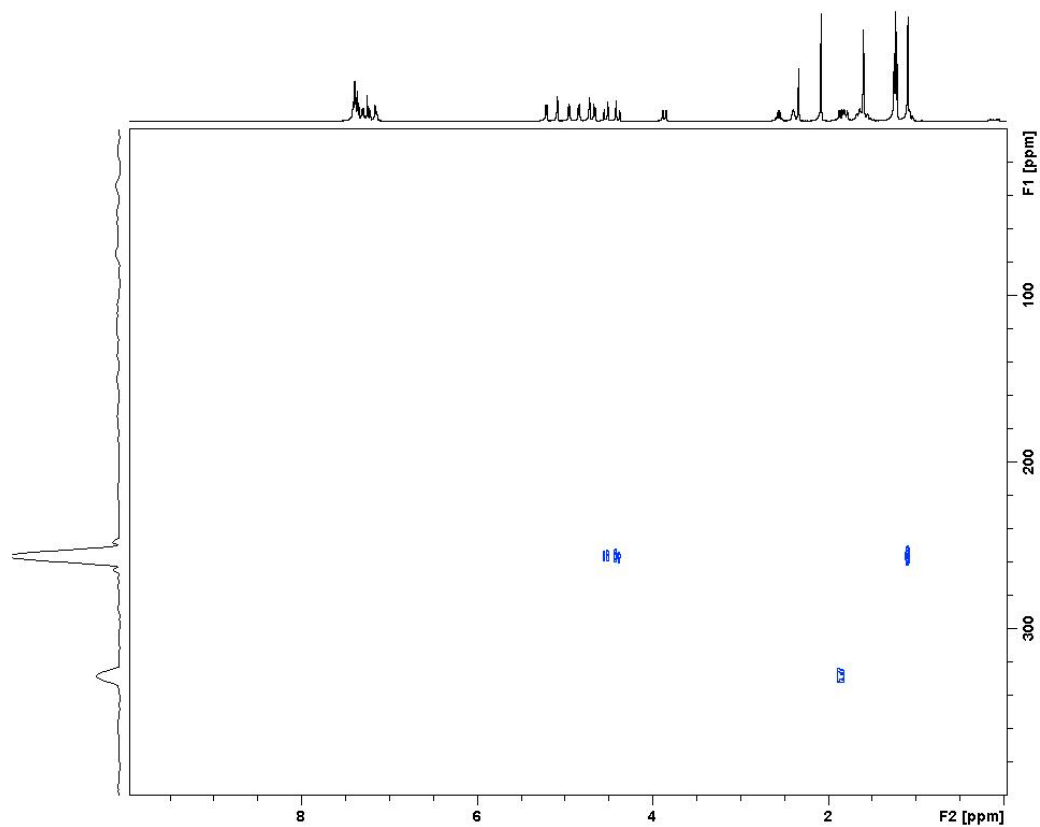



1.  $^{13}\text{C}$ - $^1\text{H}$  HSQC NMR of **3b**

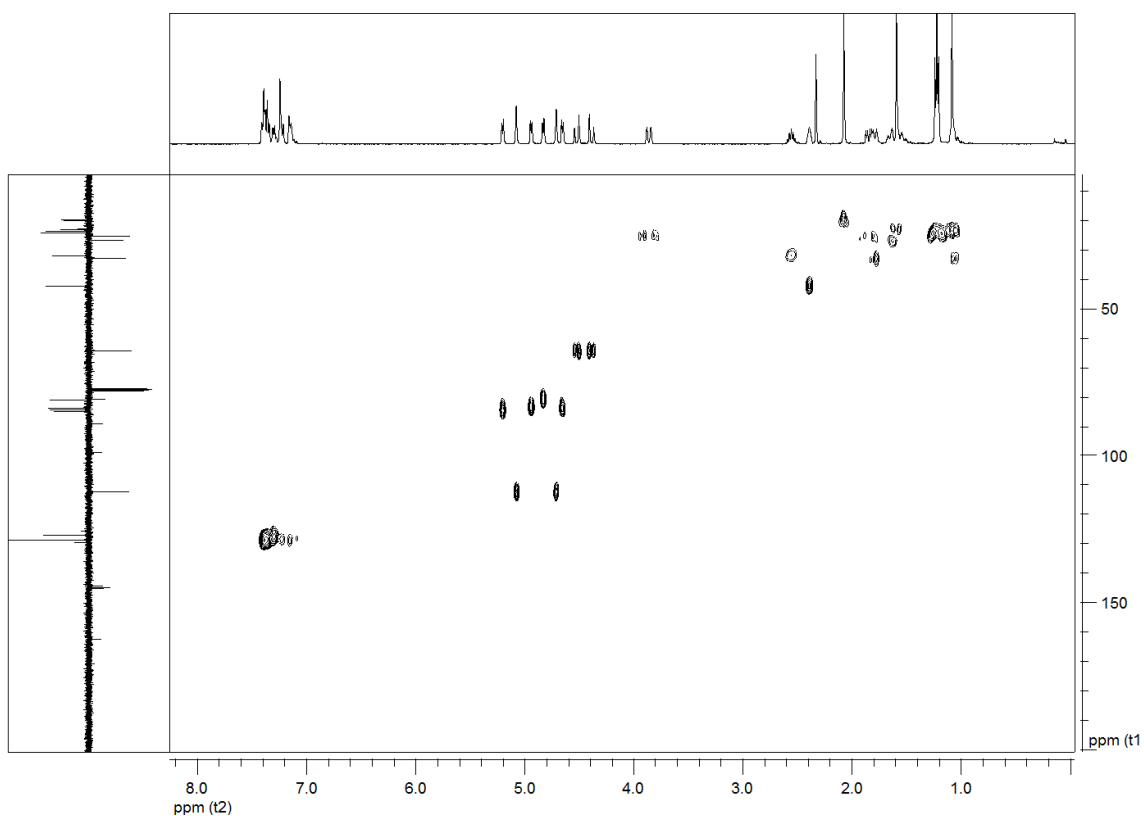

NMR spectra of **3a** in  $\text{CDCl}_3$

1.  $^1\text{H}$  NMR of **3a**.

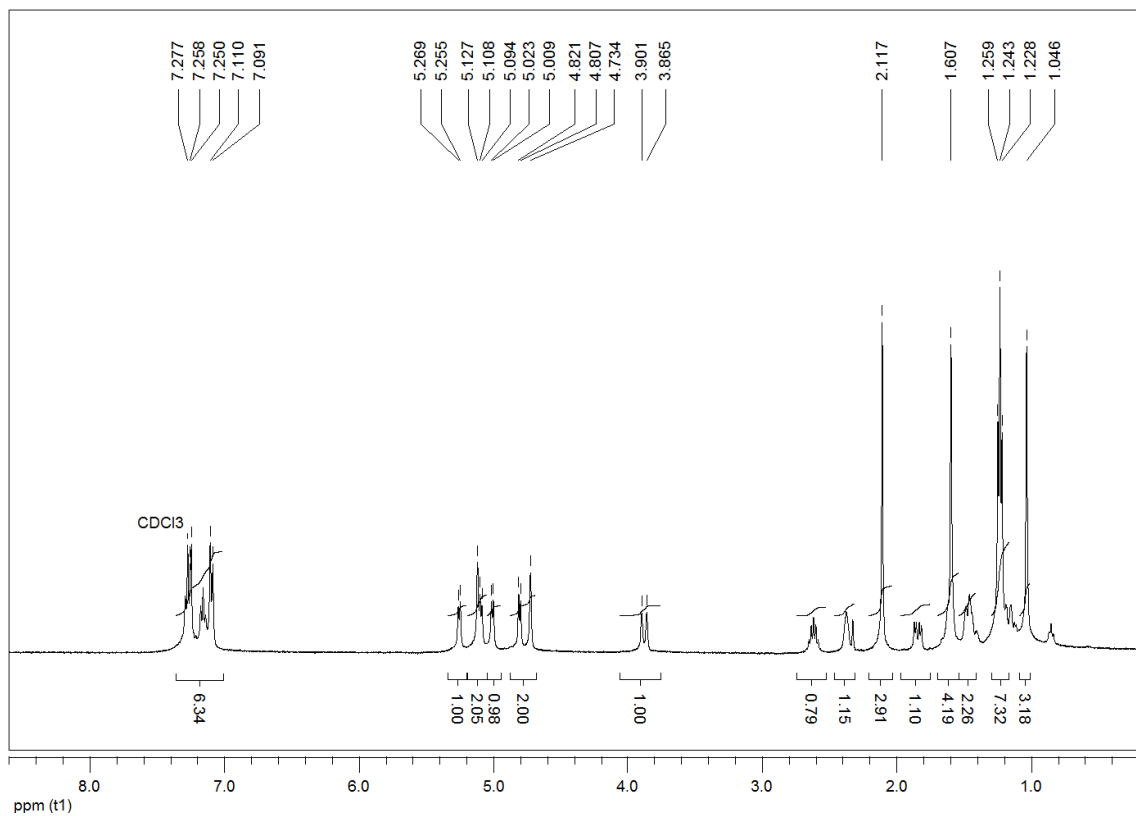

2.  $^1\text{H}$ - $^{15}\text{N}$  HMBC NMR of **3a**.

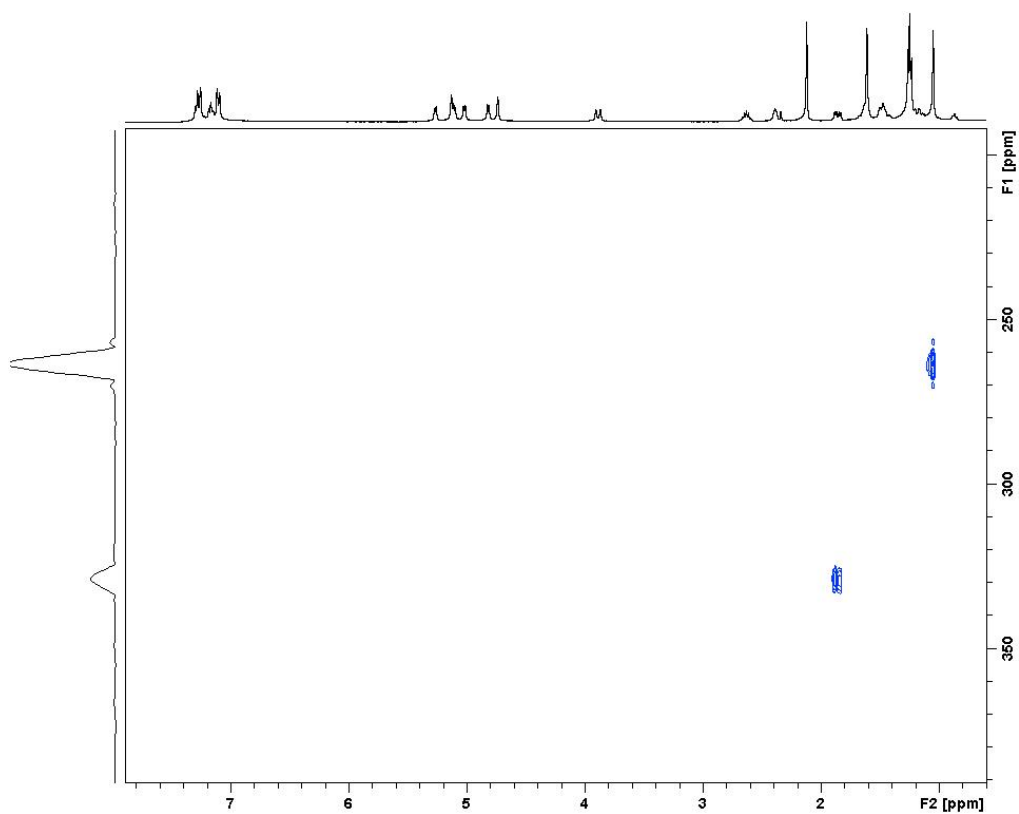

3.  $^1\text{H}$ - $^{13}\text{C}$  HSQC NMR of **3a**.

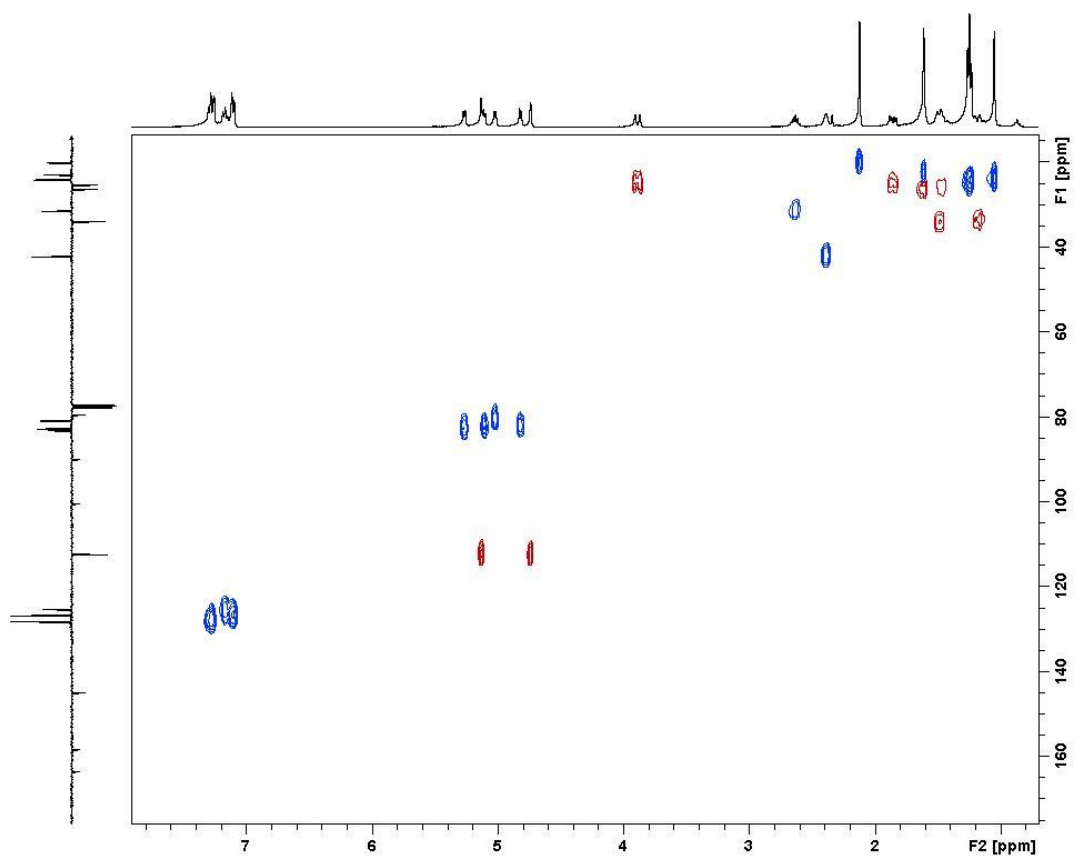

## 5. NMR experiments under physiological conditions.

Phosphate buffer saline (PBS) was prepared according to Cold Spring Harbor Protocols (<http://cshprotocols.cshlp.org/content/2006/1/pdb.rec8247>) using NaCl, KCl, Na<sub>2</sub>HPO<sub>4</sub> and KHPO<sub>4</sub> in D<sub>2</sub>O. Adjustment of pH to 7.40 was carried out using a DCl solution in D<sub>2</sub>O (0.01M) with the help of a HANNA HI208 pHmeter. Compounds **1a-1c** were then dissolved in 2500 μL of the freshly prepared PBS (6-9 mM of ruthenium compounds), final pH measured (7.36-7.38) and time-dependent <sup>1</sup>H NMR spectra of 500 μL aliquots of final solutions were carried out at 25 °C.

**Figure S3.** <sup>1</sup>H NMR spectrum (25 °C) of: **A)** **1b** in D<sub>2</sub>O, **B)** Phosphate buffer saline (PBS) in D<sub>2</sub>O, **C)** **1b** in PBS solution after 24h at r.t. **D)** **1b** in PBS solution after 48h at r.t. **E)** **1b** in PBS solution after 72 h at r.t., **F)** **1b** in PBS solution after 5 days at room temperature.

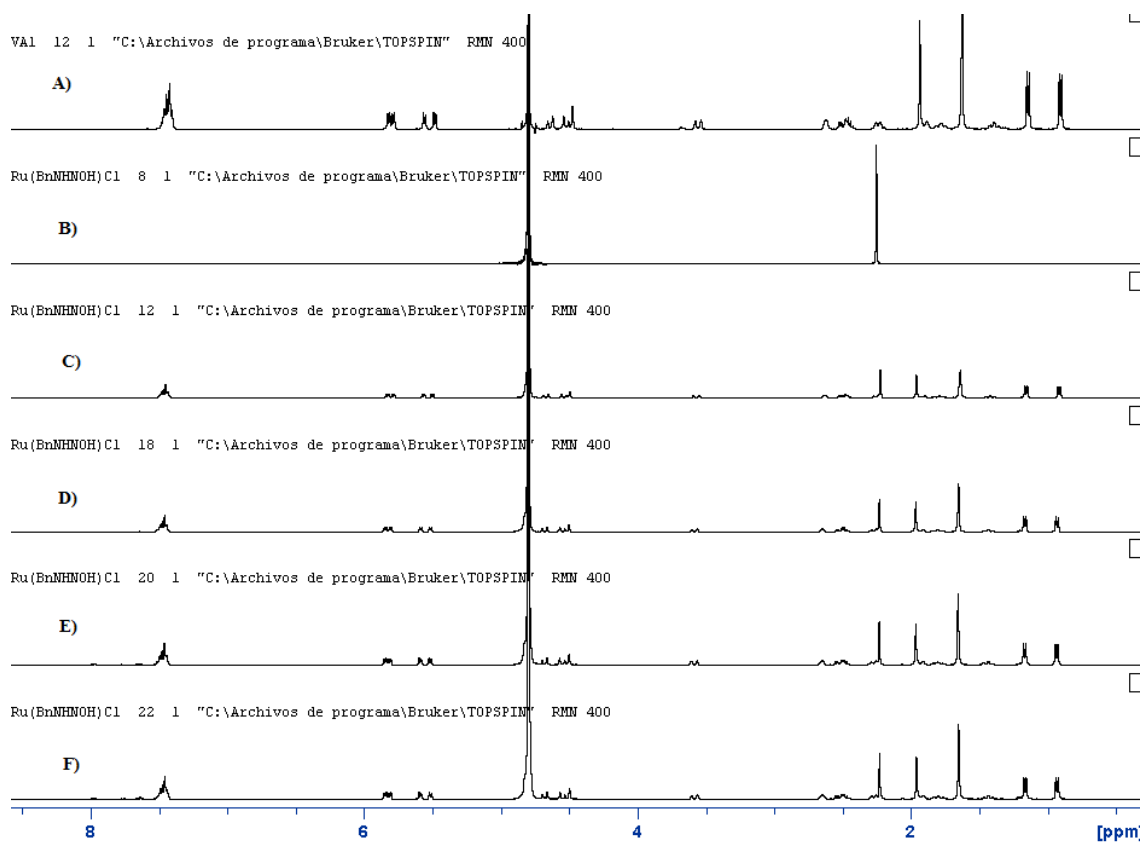

**Figure S4.** Full  $^1\text{H}$  NMR spectrum (25  $^\circ\text{C}$ ) of **1b** in PBS solution after 72 h at r.t.

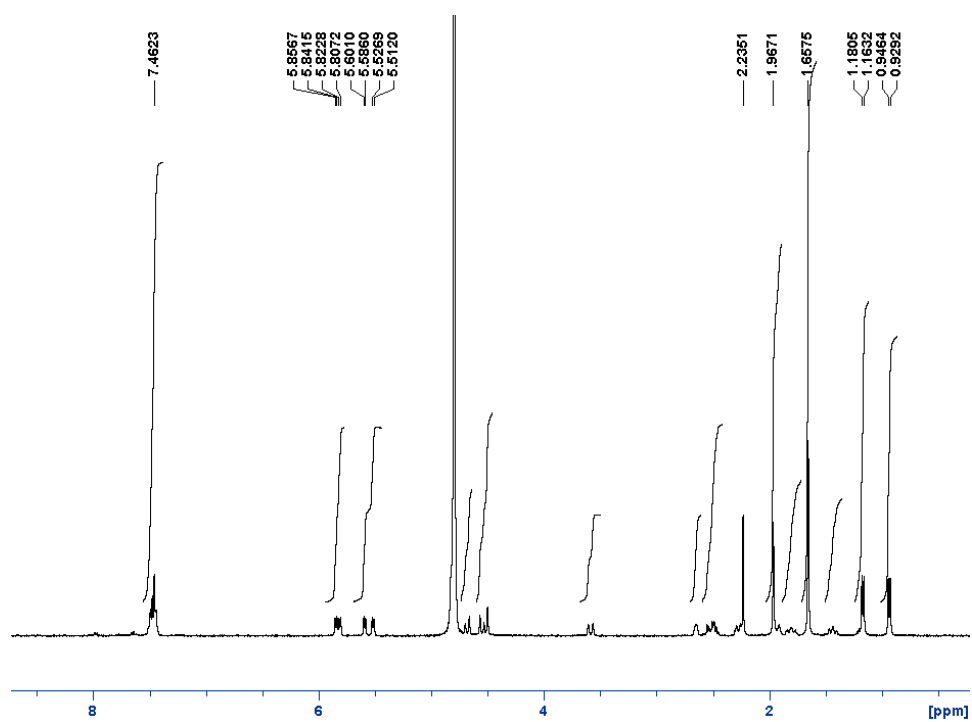

A 500  $\mu\text{L}$  aliquot of **1b** in PBS (pH = 7.4), prepared as described above, was warmed up to ca. 36  $^{\circ}\text{C}$ , and time-dependent  $^1\text{H}$  NMR spectra were carried out at 25  $^{\circ}\text{C}$ . Spectra of this experiment are shown in Figure S5.

**Figure S5.**  $^1\text{H}$  NMR spectrum (25  $^{\circ}\text{C}$ ) of: **A)** Phosphate buffer saline (PBS) in  $\text{D}_2\text{O}$ , **B)** **1b** in  $\text{D}_2\text{O}$ , **C)** **1b** in PBS solution after 24h at 36  $^{\circ}\text{C}$  **D)** **1b** in PBS solution after 72h at 36  $^{\circ}\text{C}$ .

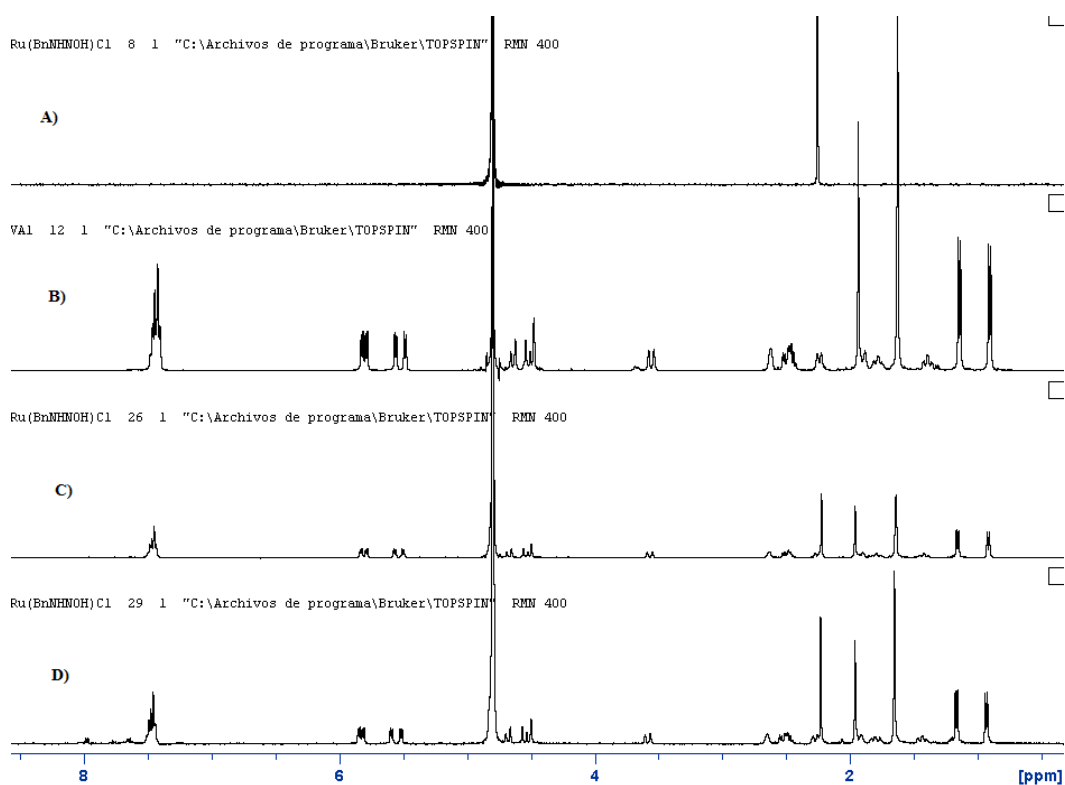

6. *In vitro* assays.

**Figure S6.** Effect of derivatives A) **1a**, B) **1b** and C) **1c** on PC3 cells viability, compared to that of ammonium-oxime compounds **a-HCl** and ruthenium dimer  $[(\eta^6\text{-p-cymene})\text{RuCl}_2]_2$ . Cells were treated with increasing doses of organic and ruthenium compounds for 3 hours. Cell viability was measured by means of MTT assay. The results are expressed as a percentage of live cells compared to control. Data are the mean  $\pm$  S.E.M. of at least three experiments. \*,  $P < 0.05$ ; \*\*,  $P < 0.01$ ; \*\*\*,  $P < 0.001$  versus Control.

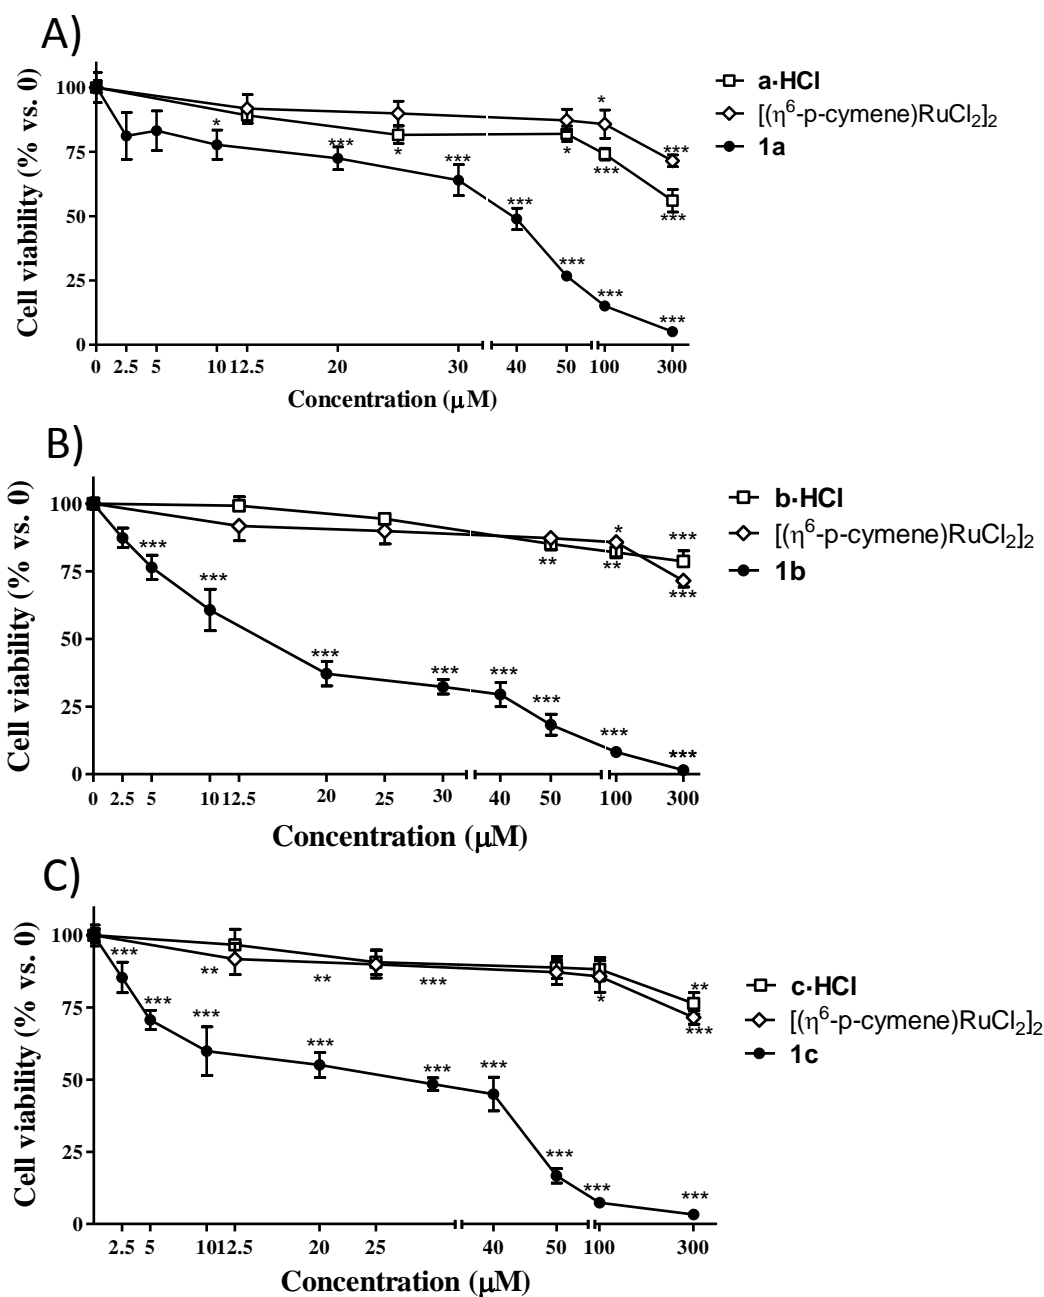

Supplement: NIHMS782536-supplement-Supporting_Information.pdf [file NIHMS782536-supplement-Supporting_Information.pdf]
